# Supplementary material for: Association between perinatal interventional activity and 2-year outcome of Swiss extremely preterm born infants: a population-based cohort study
Source: PubMed Central journal article supplement — BMJ Open. 2019 Mar 15;9(3):e024560. doi: 10.1136/bmjopen-2018-024560 (PMC6429852; doi:10.1136/bmjopen-2018-024560), 2019-03-15
Supplement: bmjopen-2018-024560.draft_revisions.pdf [file bmjopen-2018-024560.draft_revisions.pdf]

# BMJ Open

BMJ Open is committed to open peer review. As part of this commitment we make the peer review history of every article we publish publicly available.

When an article is published we post the peer reviewers' comments and the authors' responses online. We also post the versions of the paper that were used during peer review. These are the versions that the peer review comments apply to.

The versions of the paper that follow are the versions that were submitted during the peer review process. They are not the versions of record or the final published versions. They should not be cited or distributed as the published version of this manuscript.

BMJ Open is an open access journal and the full, final, typeset and author-corrected version of record of the manuscript is available on our site with no access controls, subscription charges or pay-per-view fees (<http://bmjopen.bmj.com>).

If you have any questions on BMJ Open's open peer review process please email [info.bmjopen@bmj.com](mailto:info.bmjopen@bmj.com)

# BMJ Open

## Perinatal interventional activity affects 2-year outcome of Swiss extremely preterm born infants

|                               |                                                                                                                                                                                                                                                                                                                                                                                                                                                                                                                                                                                                                                                                                                                                                                                     |
|-------------------------------|-------------------------------------------------------------------------------------------------------------------------------------------------------------------------------------------------------------------------------------------------------------------------------------------------------------------------------------------------------------------------------------------------------------------------------------------------------------------------------------------------------------------------------------------------------------------------------------------------------------------------------------------------------------------------------------------------------------------------------------------------------------------------------------|
| Journal:                      | <i>BMJ Open</i>                                                                                                                                                                                                                                                                                                                                                                                                                                                                                                                                                                                                                                                                                                                                                                     |
| Manuscript ID                 | bmjopen-2018-024560                                                                                                                                                                                                                                                                                                                                                                                                                                                                                                                                                                                                                                                                                                                                                                 |
| Article Type:                 | Research                                                                                                                                                                                                                                                                                                                                                                                                                                                                                                                                                                                                                                                                                                                                                                            |
| Date Submitted by the Author: | 01-Jun-2018                                                                                                                                                                                                                                                                                                                                                                                                                                                                                                                                                                                                                                                                                                                                                                         |
| Complete List of Authors:     | Adams, Mark; Universitätsspital Zürich, Department of Neonatology; University Zurich, Epidemiology, Biostatistics and Prevention Institute<br>Berger, Thomas; Kinderspital Luzern, Neonatal and Paediatric Intensive Care Unit<br>Borradori-Tolsa, Cristina; Geneva University Hospital, Department of Paediatrics,<br>Bickle-Graz, Myriam; University Hospital Lausanne, Department Woman-Mother-Child<br>Grunt, Sebastian; Children's University Hospital, Inselspital, University of Bern, Division of Neuropaediatrics, Development and Rehabilitation<br>Gerull, Roland; University of Basel Children's Hospital (UKBB), Department of Neonatology<br>Bassler, Dirk; University Hospital Zurich, Department of Neonatology<br>Natalucci, Giancarlo; UniversitätsSpital Zurich, |
| Keywords:                     | NEONATOLOGY, Fetal medicine < OBSTETRICS, Neonatal intensive & critical care < INTENSIVE & CRITICAL CARE, Quality in health care < HEALTH SERVICES ADMINISTRATION & MANAGEMENT                                                                                                                                                                                                                                                                                                                                                                                                                                                                                                                                                                                                      |
|                               |                                                                                                                                                                                                                                                                                                                                                                                                                                                                                                                                                                                                                                                                                                                                                                                     |

SCHOLARONE™  
Manuscripts

## Perinatal interventional activity affects 2-year outcome of Swiss extremely preterm born infants

Mark Adams MSc<sup>1,2,3</sup>, Professor Thomas M. Berger MD<sup>2</sup>, Cristina Borradori-Tolsa MD<sup>4</sup>, Myriam Bickle-Graz MD<sup>5</sup>, Sebastian Grunt MD<sup>6</sup>, Roland Gerull MD<sup>7</sup>, Professor Dirk Bassler MD, MSc<sup>1</sup>, and Giancarlo Natalucci MD<sup>1,2,8</sup> for the Swiss Neonatal Network & Follow-Up Group

### AFFILIATIONS

<sup>1</sup>Department of Neonatology, University of Zurich and Zurich University Hospital, Zurich, Switzerland;

<sup>2</sup>Swiss Neonatal Network & Follow-up Group, Zurich, Switzerland;

<sup>3</sup>Epidemiology, Biostatistics and Prevention Institute, University of Zurich, Zurich, Switzerland;

<sup>4</sup>Department of Paediatrics, Geneva University Hospital, Geneva, Switzerland;

<sup>5</sup>Clinic of Neonatology, Department Woman-Mother-Child, University Hospital Lausanne, Lausanne, Switzerland;

<sup>6</sup>Division of Neuropaediatrics, Development and Rehabilitation, Children's University Hospital, Inselspital, University of Bern, Bern, Switzerland;

<sup>7</sup>Department of Neonatology, University of Basel Children's Hospital (UKBB), Basel, Switzerland;

<sup>8</sup>Child Development Center, University Children's Hospital Zurich, Zurich, Switzerland.

### CORRESPONDING AUTHOR

Mark Adams, Department of Neonatology, University Hospital Zurich, Frauenklinikstrasse 10, 8091 Zurich, Switzerland; Tel. +4144 556 3034; mark.adams@usz.ch.

### Short title

Perinatal intervention activity affects 2-year outcome

### Financial Disclosure Statement

Mark Adams receives a salary as network coordinator for the Swiss Neonatal Network. Giancarlo Natalucci received financial support by the Swiss National Science Foundation; grant PZOOP3\_161146. The remaining authors have indicated they have no financial relationships relevant to this article to disclose.

### Funding

The authors received no specific funding for this work. The sponsors were not involved in the following matters: study design; collection, analysis, and interpretation of data; writing of the report; and the decision to submit the manuscript for publication.

### Conflict of Interest Statement

Potential Conflicts of Interest: Mark Adams receives a salary as network coordinator for the Swiss Neonatal Network. The remaining authors have indicated they have no potential conflicts of interest relevant to this article to disclose.

### List of abbreviations

1  
2  
3  
4 aOR: adjusted odds ratio; AUC: area under receiver operator characteristic (ROC) curve;  
5 BSIDII: Bayley Scales of Infant Development, second edition; Bayley-III: Bayley Scales of  
6 Infant and Toddler Development, Third edition; BPD: bronchopulmonary dysplasia; CI:  
7 confidence interval; cPVL: cystic periventricular leukomalacia; GA: gestational age; GMDS:  
8 Griffith scales of Infant Development; GMFCS: Gross Motor Function Classification System;  
9 IVH: intraventricular haemorrhage; LOS: late onset sepsis; NDI: neurodevelopment impairment;  
10 NEC: necrotizing enterocolitis; NICHD NRN: national institute of child health neonatal research  
11 network; ROP: retinopathy of prematurity; SD: standard deviation; SES: socio-economic status;  
12 SNN: Swiss Neonatal Network & Follow-up Group.  
13

## 14 ABSTRACT

15 **Objectives:** To investigate if centre-specific levels of perinatal interventional activity were  
16 associated with neonatal and neurodevelopmental outcome at two years of age in two separately  
17 analysed cohorts of infants: cohort A born at 22 to 25, and cohort B born at 26 to 27 gestational  
18 weeks, respectively.  
19

20 **Design:** Geographically defined, retrospective cohort study.

21 **Setting:** All nine level III perinatal centres (neonatal intensive care units (NICUs) and affiliated  
22 obstetrical services) in Switzerland.

23 **Patients:** All live-born infants in Switzerland in 2006-2013 below 28 gestational weeks,  
24 excluding infants with major congenital malformation.

25 **Outcome measures:** Outcomes at 2 years corrected for prematurity were mortality, survival  
26 with any major neonatal morbidity, and with severe-to-moderate neurodevelopmental  
27 impairment (NDI).  
28

29 **Results:** Cohort A associated birth in a centre with high perinatal activity with low mortality  
30 (aOR: 0.22; 95% confidence interval: 0.16-0.32), while no association was observed with  
31 survival with major morbidity (aOR: 0.74; 95% confidence interval: 0.46-1.19), and with NDI  
32 (aOR: 0.97; 95% confidence interval: 0.46-2.02). Median age at death (8 versus 4 days) and  
33 length of stay (100 versus 73 days) were higher in high than in low activity centres. The results  
34 for cohort B mirrored those for cohort A.

35 **Conclusions:** Centres with high perinatal activity in Switzerland have a significantly lower risk  
36 for mortality while having comparable outcomes among survivors. This confirms results of other  
37 studies but in a geographically defined area applying a more restrictive approach to initiation of  
38 perinatal intensive care than previous studies. The study adds that infants up to 28 weeks  
39 benefited from a higher perinatal activity and why further research is required to better estimate  
40 the added burden on children who ultimately do not survive.  
41

## 42 Strengths and limitations of this study

- 43
- 44 • Geographically defined cohort study comparing 2-year outcome of extremely preterm  
45 infants between hospitals with high and low perinatal interventional activity based on a  
46 quantitative score of 3 obstetric and 4 neonatal indicators.
  - 47 • Crude and risk-adjusted odds ratios for outcome between high and low activity centres  
48 were calculated using regression models and measuring predictive validity of risk  
49 adjustment.
  - 50 • Missing outcome data of surviving infants lost to follow-up were addressed by multiple  
51 imputation and the validity of data imputation was tested by sensitivity analysis using  
52 non-imputed data.
  - 53 • Further minor limitations are represented by the composite nature of the definitions of the  
54 perinatal interventional activity and of the neurodevelopmental outcomes, which could  
55 have led to a loss of information.  
56  
57  
58  
59

1  
2  
3  
4  
5  
6  
7  
8  
9  
10  
11  
12  
13  
14  
15  
16  
17  
18  
19  
20  
21  
22  
23  
24  
25  
26  
27  
28  
29  
30  
31  
32  
33  
34  
35  
36  
37  
38  
39  
40  
41  
42  
43  
44  
45  
46  
47  
48  
49  
50  
51  
52  
53  
54  
55  
56  
57  
58  
59  
60

**Keywords**

Extremely preterm, limit of viability, perinatal intervention, mortality, morbidity, 2 year outcome

**Word count**

3239

For peer review only

## INTRODUCTION

Over recent decades, progress in perinatal care has led to vastly improved survival rates for infants born at extremely low gestational age (GA). Consequently, the GA limit for initiating life-sustaining intensive care at birth was lowered to 22 weeks, below which treatment is generally not recommended.[1] This however raised ethical concerns regarding the added burden to infants who ultimately do not survive and the increased risk of neurosensory impairment among those that do survive.[2] There is little consensus about the policy of treating these infants. Instead, hospital practices regarding the initiation of intensive care have dramatically influenced rates of survival and survival without impairment.[3] This has led to large outcome variation among hospitals. In 2015, Rysavy et al. quantified the effect of perinatal interventional activity on outcome between a group of 24 centres of the NICHD NR network in the United States. Among infants born at 22-23 weeks gestation, centre rates of active treatment accounted for 78% of the variation in survival between centres. For those born at 24 weeks gestation it accounted for 22% of the variation.[4] There is a similar variation in decision making approaches in Europe, which appears to reflect local philosophy and practice rather than economic or demographic markers, individual variations in health expenditure or rates of preterm birth.[5] Swiss obstetricians and neonatologists are known to be generally restrictive with regards to initiation of intensive care for infants at the limit of viability. A recent study revealed that the decision-making regarding initiation of treatment was based almost exclusively on gestational age (GA) and that most infants born < 24 weeks gestation received a priori comfort care.[6] Nevertheless, centre-to-centre outcome variability has repeatedly been reported and is assumed to be in part associated with the local ethical decision making.[7-9] What remained unclear was whether the lower mortality in some centres lead to higher risk of neurodevelopmental impairment (NDI) in survivors.

This study aimed to quantify the outcome differences between centres with a higher propensity towards providing active perinatal care at birth from those that provide more a priori comfort

1  
2  
3 care. We assessed infants in cohort A (22+0 to 25+6 weeks gestational age (GA)) and compared  
4  
5 their outcome variability with that in cohort B (26+0 to 27+6 weeks GA) where we expected no  
6  
7 difference in either perinatal care provision or outcome based on previous studies.[4,10–13]  
8  
9

## 10 11 **METHODS**

### 12 13 **Study population and procedure**

14  
15 Geographically defined, retrospective cohort study including all live born infants between 22+0  
16  
17 to 27+6 weeks of gestation in Switzerland from 2006-2013. We excluded infants born with a  
18  
19 major congenital malformation, defined as being the primary cause of death or requiring surgery  
20  
21 or a chromosomal anomaly. We also excluded 4 infants born and treated exclusively in 3  
22  
23 stepdown units. We extracted electronically recorded data (challenged for plausibility and  
24  
25 completeness) from the prospective national database of the Swiss Neonatal Network & Follow-  
26  
27 up Group (SNN). Data from delivery room deaths were audited by a researcher visiting the  
28  
29 hospitals' maternity wards.  
30  
31

32  
33  
34  
35 Data collection and evaluation for this study has been approved by the institutional ethical  
36  
37 review board (KEK-ZH-Nr 2014-0552). Participating centres were obliged to inform parents  
38  
39 about the scientific use of anonymized data.  
40  
41

### 42 43 **Neonatal data**

44  
45 Perinatal and neonatal variables were defined as follows: GA as the best estimate available based  
46  
47 on prenatal ultrasound examination during the first trimester of pregnancy. Birth weight z-scores,  
48  
49 intraventricular haemorrhage grade 3 or higher (IVH), cystic periventricular leukomalacia  
50  
51 (cPVL), bronchopulmonary dysplasia (BPD), severe retinopathy of prematurity stages 3-4  
52  
53 (ROP), necrotizing enterocolitis (NEC), late onset neonatal sepsis (LOS), and Socioeconomic  
54  
55 status (SES) were defined as previously published.[14]  
56  
57  
58  
59

### **Neurodevelopmental outcome at 2 years of age**

Experienced neuro- or developmental paediatricians performed the standardized Swiss follow-up assessment[15] at 18-24 months corrected age in one of the Swiss follow-up centres. Between 2006 and 2012, examinations were based on Bayley Scales of Infant Development, 2. edition (BSID-II)[16] and afterwards on Bayley scales of infant and toddler development, 3. edition (Bayley-III).[17] According to recent literature,[18–20] Up until 2006, some of the children were tested using the Griffiths mental development scales-Revised (GMDS)[21] during the transition period to BSID-II. Bayley-III scores below 85 (-1SD) were considered as equivalent of indices below 70 (-2SD) in the BSID-II and the GMDS. Infants with significant disability precluding completion of the development test were assigned a development score of 1 below -3SD. Cerebral palsy was defined according to Rosenbaum[22] and was graded according to the Gross Motor Function Classification System (GMFCS) For Children Aged  $\leq 2$  Years.[23] Vision and hearing were assessed by either direct examination or caregiver report.

### **Perinatal interventional activity score**

In order to differentiate between Swiss centres with a higher propensity to initiate intensive care for infants born below 26 weeks gestation we calculated a perinatal activity score per centre based on the model presented by Serenius et al. in 2015.[10] Obstetric and neonatal activity scores reflecting the intensity of care in each centre were calculated on the basis of the rates of 3 key obstetric indicators (delivery at level III hospitals, i.e. inborn; complete course of antenatal steroids; caesarean section), and 4 key neonatal indicators (surfactant within 2 hours after birth; any of the following activities in the delivery room: bag/mask ventilation, continuous positive airway pressure, endotracheal intubation, epinephrine or adrenaline supply, cardiac compression; no recorded decision for primary non-intervention in the delivery room [available for all infants]; infants admitted for intensive care [out of infants alive at 30 minutes after birth]). The mean



1  
2  
3 obstetric and neonatal activity scores comprised the perinatal activity score (henceforth, activity  
4 score). Each step included normalization by assigning the centre with the highest rate for each  
5 indicator a score of 100; the remaining centres were assigned proportional scores. We calculated  
6 an activity score for infants born between 22-25 weeks gestation (cohort A) and a separate one  
7 for infants born 26-27 weeks gestation (cohort B). The first score was used to classify the nine  
8 Swiss perinatal centres into a “low” and a “high” activity group using the arbitrary threshold of  
9 an activity score of 80. To allow comparison between cohort A and cohort B, cohort B was split  
10 into the same centres with low and high activity as for cohort A. To confirm the dichotomous  
11 association of perinatal activity with outcome, we also tested for a linear association. For this, we  
12 generated a variable that increases by one for every 5-point increase in perinatal activity using  
13 the two perinatal activity scores for cohort A and B.  
14  
15  
16  
17  
18  
19  
20  
21  
22  
23  
24  
25  
26  
27  
28

### 29 **Outcome**

30 Outcome parameters were defined as follows: mortality at 2 years corrected age, death or  
31 moderate-to-severe NDI, death or major morbidity, survival with moderate-to-severe NDI, and  
32 survival with major morbidity. Moderate-to-severe NDI was defined as either mental or motor  
33 development index below 70 (-2SD) in the BSID-II; cognitive or motor composite score below  
34 85 (see below) in the Bayley-III; a global score of the GMDS below 70 (-2SD); cerebral palsy  
35 with GMFCS above 1; the absence of useful hearing even with aids (i.e. >90dB hearing level);  
36 blindness or only perception of light. Major morbidities encompassed IVH, cPVL, BPD, ROP,  
37 NEC or LOS.  
38  
39  
40  
41  
42  
43  
44  
45  
46  
47  
48  
49

### 50 **Data completeness**

51 Patient population coverage was assessed by comparison with the birth registry of the Swiss  
52 Federal Statistical Office and yielded 86.4% of all live births between 22-27 weeks gestation.  
53 Data per item was missing in 1.2% of datasets for the outcome “major morbidity” or less than  
54  
55  
56  
57  
58  
59  
60

1  
2  
3 0.1% in all other cases. As 2-year follow-up data was missing in 11% of all surviving infants  
4 between 22-25 weeks gestation and 17% between of 26-27 weeks gestation, we performed a  
5 fivefold imputation with chained equations for the cohorts A (all infants), A (survivors), B (all  
6 infants) and B (survivors), respectively, allowing the calculation of pooled adjusted odds ratios  
7 (aOR) for the above listed outcomes.[24] Data for imputation were determined as missing at  
8 random. As a sensitivity analysis, we performed the same tests with crude, i.e. non-imputed data,  
9  
10  
11  
12  
13  
14  
15  
16  
17

### 18 **Statistical analysis**

19  
20 We performed multivariable adjusted logistic regression to compare outcome between centres  
21 with lower and higher perinatal activity. Adjustment was made for GA, GA<sup>2</sup> (to better model the  
22 non-linear dependency of most neonatal outcomes on GA), birth weight z-score, male sex,  
23 multiple births, outborn, and socio-economic status. To estimate the validity of the adjustment,  
24 we calculated how well the variables listed above predicted outcome. If this predicted validity is  
25 low, the adjustment made has limited explanatory power.[25] We calculated the area under  
26 receiver operating characteristics curve (AUC). AUC values between 0.7-0.8 were considered to  
27 represent moderate, and >0.8 to represent high predictive validity, respectively. All statistical  
28 analyses were performed using R Version 3.4.[26]  
29  
30  
31  
32  
33  
34  
35  
36  
37  
38  
39  
40  
41

## 42 **RESULTS**

### 43 **Study population and neonatal data**

44  
45  
46  
47 A total of 2063 infants were born alive in Switzerland between 2006 and 2013 (Figure 1). 1839  
48 of those infants were registered by SNN between 2007 to 2013. They correspond to 1900 life-births  
49 registered at the Swiss Federal Statistical Office in the same time period which results in a population  
50 coverage of 97% for the study period (reference data for 2006 were not available as GA was not included  
51 in the national register prior to 2007). Of the 2063 infants we excluded 4 infants because they were  
52 born in and treated at 3 stepdown units and 85 infants because of major congenital  
53  
54  
55  
56  
57  
58  
59  
60

malformations. Among the 1974 included infants, 712 (36%) died before discharge and 6 (0.3%) after discharge but before reaching two years of age. In cohorts A and B, 319 (89% of survivors) and 743 (83%) were assessed at 2 years corrected age, respectively. 194 (15%) children were lost to follow-up (109 refused follow-up, 57 could not be reached/moved away, 28 unknown loss to follow-up). In both cohorts, difference between baseline characteristics of children with and without follow-up was negligible (Table 1), particularly concerning the factor “activity score” which determines the comparison groups for the subsequent analysis. Outborn children were less frequently assessed in both cohorts.

### **Perinatal interventional activity score**

Table 2 displays the proportion of infants receiving either of the treatments determining the obstetrical activity (items [1] – [3]) and the neonatal activity (items [4] – [7]) for cohort A in each centre. Activity scores were determined out of the mean of the obstetric and neonatal activity scores and ranged from 57 to 98. Four centres with an activity score < 80 were classified as “low activity centres” with the remaining five centres classified as “high activity centres”. A separate centre specific activity score was determined for cohort B using the same routine (supplemental Table 1). Each 5-point increase in perinatal activity score reduced the risk for mortality within two years of life for cohort A (aOR: 0.74, 95% confidence interval [CI] 0.68-0.81) and cohort B (aOR: 0.82, 95% CI 0.69 to 0.96).

After risk adjustment, the aOR in cohort A for mortality (0.22, 95% CI 0.16-0.32) and death or NDI (0.31, 95% CI 0.21-0.44) were significantly lower (Figure 2) for high compared to low activity centres. After restricting the cohort to survivors, aOR for any major neonatal morbidities was 0.74 (95% CI 0.46-1.19) and for moderate to severe NDI 0.97 (95% CI 0.46-2.02). The crude baseline characteristics of low versus high activity centres in cohort A (Table 3) were comparable for size, GA range, birth weight z-score, multiple births and SES. However, High

1  
2  
3 activity centres had more male infants and less outborn infants. The crude outcome proportions  
4 reflect the aOR results. Repeating the same evaluation using non-imputed data resulted in almost  
5 the same point-estimates and confidence intervals (dotted lines in Figure 2). Excluding the  
6  
7 delivery room deaths, median NICU age at death in high activity centres was higher (8 versus 4  
8  
9 days) as was length of stay (100 versus 73 days). As can be seen in Figure 3, the distribution of  
10  
11 age at death was different between high and low activity centres. In high activity centres, the  
12  
13 highest density was reached above the median, whereas it was below the median in low activity  
14  
15 centres. The violin plot thereby allows taking the full distribution of the data into account rather  
16  
17 than relying on median and interquartile range alone.  
18  
19  
20  
21  
22  
23

24 Centres classified as having “high activity” for cohort A, still had a higher perinatal activity  
25  
26 score (91 vs. 84) in cohort B with matching outcome variability. aOR for mortality (0.49, 95%  
27  
28 CI 0.34-0.71) and death or NDI (0.72, 95% CI 0.53-0.97) were significantly lower in high  
29  
30 activity centres (Figure 2). In contrast to cohort A the aOR for any major morbidities was also  
31  
32 significantly lower (0.63, 95% CI 0.48-0.84) whereas moderate to severe NDI outcome in  
33  
34 survivors was higher without reaching significance (1.17, 95% CI 0.77-1.78). Again, crude  
35  
36 baseline characteristics (Table 3) were comparable with more male and fewer outborn infants in  
37  
38 high activity centres. Crude outcomes mirror the aOR result. In cohort B, median age at death in  
39  
40 NICU in high activity centres was again higher (11 versus 6 days), whereas length of stay was  
41  
42 only somewhat longer (85 versus 78 days).  
43  
44  
45  
46  
47

### 48 **Neurodevelopmental outcome at 2 years of age**

49

50 Follow-up assessment was performed at a mean (SD) corrected age of 22.6 (3.1) months (Table  
51  
52 4). Of 1062 examined children, 729 (69%), 265 (25%), and 46 (4%) were assessed with the  
53  
54 Bayley-II, Bayley-III, and GMDS, respectively while in 19 (2%) children only a part of a  
55  
56 developmental assessment could be performed because of severe cerebral palsy or poor  
57  
58  
59  
60

1  
2  
3 compliance. 220 (21%) infants suffered from moderate-to-severe NDI and 842 (79%) infants  
4  
5 showed favourable outcome.  
6  
7

## 8 9 **DISCUSSION**

10  
11 Swiss perinatal centres with a higher score of perinatal activity for infants at the borderline of  
12  
13 viability (cohort A) had significantly lower aOR for mortality and for the composite outcome  
14  
15 death or NDI. After restricting the cohort to survivors at two years of age corrected for  
16  
17 prematurity, there was no significant difference between centres with high and low intensity  
18  
19 regarding risk for major morbidity or NDI. Cohort B mirrored the outcome differences between  
20  
21 high and low activity perinatal centres determined for cohort A, i.e. significantly lower aOR for  
22  
23 mortality and for death or NDI. In contrast to cohort A, the lower mortality in high activity  
24  
25 centres in cohort B was based exclusively on NICU mortality. High activity centres in cohort B  
26  
27 had a significantly lower aOR for any major neonatal morbidity. Except for the aOR for  
28  
29 mortality, death or NDI or any major morbidity in cohort A, the predictive validity measured by  
30  
31 AUC was low to negligible. For those aOR we would expect the true value to lie between the  
32  
33 crude and the adjusted level, which confirm the results.[27]  
34  
35  
36  
37  
38

39  
40 The association between perinatal interventional activity and outcome has been reported before.  
41  
42 We based our centre specific activity score on the model of the Swedish regional activity score  
43  
44 published by Serenius et al. (2015).[10] In their study, live-born infants between 22-24 weeks  
45  
46 GA treated in regions with high versus low activity also had lower aOR for mortality (0.43, 95%  
47  
48 CI: 0.26-0.73) and for death or NDI (aOR: 0.48, 95% CI: 0.27-0.84) at 2.5 years corrected age.  
49  
50 As in our study, survivors in high activity regions did not have a higher risk for any NDI (aOR:  
51  
52 0.63, 95% CI: 0.31-1.28). This reflects the difficulty in assessing outcome at 2 years in general  
53  
54 and using NDI as a measure of efficacy.[28,29] Other reports between intensity of care and  
55  
56 survival date back as far as 2004 when Hakansson et al. for the first time reported how a  
57  
58  
59

1  
2  
3 proactive perinatal strategy increases the number of live births and improves the infant's  
4 postnatal condition in Sweden.[30] Rysavy et al. were also able to show a clear association  
5 between the outcome of infants receiving active care and those that did not for infants between  
6 22-24 weeks GA, but not for those between 25-26 weeks GA.[4] A study determining the  
7 perinatal outcome for extremely preterm infants in relation to place of birth in England reported  
8 lower odds for mortality when they were born in a level 3 centre with higher perinatal activity  
9 based on staffing and activity data collected by questionnaire.[11] In 2013, an NICHD study  
10 could show that 'centre intervention rates' significantly predicted mortality rates for infants <25  
11 weeks but not for infants  $\geq 25$  weeks gestation.[12] Centre intervention rates included  
12 parameters similar or identical to the ones chosen for the calculation of the activity score in this  
13 study. Using yet another version of a similar intervention score, the MOSAIC study of 2009 was  
14 able to show an association between the score and mortality for infants <26 weeks but not for  
15 infants at 26 – 27 weeks gestation.[13] Swiss centres rarely initiated intensive care below 24  
16 weeks gestation during the study period.[6,8] This is why we chose the same GA ranges for  
17 cohorts A and B as the MOSAIC study but not as the other studies. Yet, even with the more  
18 restrictive approach we confirm the results of previous studies in infants < 26 weeks gestation.  
19  
20  
21  
22  
23  
24  
25  
26  
27  
28  
29  
30  
31  
32  
33  
34  
35  
36  
37  
38

39 Swiss centres classified as having "high activity" for cohort A still had a higher perinatal activity  
40 score in cohort B. In contrast to the studies reported above,[4,10–13] the resulting outcome  
41 variability in cohort B is congruent to the variability in cohort A. As variability in mortality in  
42 cohort B was exclusively observed in NICU- but not in delivery room-mortality, it is difficult to  
43 determine an association to either higher perinatal activity or quality of care, or a combination of  
44 both. Arguments exist for each: centres of the high activity group also have a higher perinatal  
45 activity score in cohort B and the continuous perinatal activity score reduces risk of mortality per  
46 each 5-point increase in activity score. As variability in mortality in cohort B exists exclusively  
47 for NICU and not for delivery room mortality, variability in the decision-making process  
48  
49  
50  
51  
52  
53  
54  
55  
56  
57  
58  
59  
60

1  
2  
3 regarding redirection of care based on futility may exist. On the other hand, centres with a high  
4  
5 perinatal activity also had a significantly lower aOR for any major morbidities which would  
6  
7 favour the assumption of difference in quality of care. This would be in line with the  
8  
9 observations by Smith et al. whose findings suggest that the approach taken with infants at the  
10  
11 limits of viability is associated with improved outcomes of more-mature infants.[31]  
12

13  
14  
15 As reported in other studies,[10,32] median age at death was higher in high activity centres.  
16  
17 Serenius et al. argue that the longer duration of life allows for a trial of life, whereas Costeloe et  
18  
19 al. see the reason in different principle causes of death with a tendency towards later  
20  
21 complications of prematurity in the case of the group of infants dying later.[10,32] Figure 3  
22  
23 displays that the age at death for both cohorts are comparable in their interquartile range but,  
24  
25 together with the longer median length of stay for all infants, indicate an added burden to infants  
26  
27 who ultimately do not survive in high activity centres.  
28  
29

### 30 31 32 33 Conclusions

34  
35 A 5-point increase in perinatal interventional activity significantly decreases the aOR for  
36  
37 mortality of infants born 22-25 weeks gestation in Switzerland. High activity centres have a  
38  
39 significantly lower aOR for mortality and death or NDI and outcome among survivors at 2 years  
40  
41 of age is comparable. The effect observed was repeated for infants between 26-27 weeks  
42  
43 gestation, indicating that all extremely preterm infants benefited. Age at death and duration of  
44  
45 hospitalization are higher suggesting a higher burden for patients who ultimately do not survive  
46  
47 in high activity centres. Although the results favour the high activity approach, further research  
48  
49 is required to better estimate the accompanying added burden on the children. Outcome data at 5  
50  
51 years of age or later are urgently required to confirm these findings with a more predictive long-  
52  
53 term assessment.  
54  
55  
56  
57  
58  
59  
60



## Acknowledgements

We gratefully thank all children and their parents who participated in this study.

We also thank the following members of the Swiss Neonatal Network & Follow-Up Group for their non-author contributors:

Aarau: Cantonal Hospital Aarau, Children's Clinic, Department of Neonatology (Ph. Meyer, C. Anderegg), Department of Neuropaediatrics (A. Capone Mori, D. Kaeppli); Basel: University of Basel Children's Hospital (UKBB), Department of Neonatology (S. Schulzke), Department of Neuropaediatrics and Developmental Medicine (P. Weber); Bellinzona: San Giovanni Hospital, Department of Paediatrics (G.P. Ramelli, B. Goeggel Simonetti); Berne: University Hospital Berne, Department of Neonatology (M. Nelle), Department of Paediatrics (B. Wagner), Department of Neuropaediatrics (M. Steinlin, S. Grunt); Biel: Children's Hospital Wildermeth, Department of Pediatrics (M. Gebauer), Development and Paediatric Neurorehabilitation Center (R. Hassink); Chur: Children's Hospital Chur, Department of Neonatology (W. Bär), Department of Neuropaediatrics (E. Keller, Ch. Killer); Fribourg: Cantonal Hospital Fribourg, Department of Neuropaediatrics (K. Fuhrer); Geneva: Department of child and adolescent, University Hospital (HUG), Neonatology Units (R. E. Pfister), Division of Development and Growth (P. S. Hüppi, C. Borradori-Tolsa); Lausanne: University Hospital (CHUV), Department of Neonatology (J.-F. Tolsa, M. Roth-Kleiner), Department of Child Development (M. Bickle-Graz); Lucerne: Children's Hospital of Lucerne, Neonatal and Paediatric Intensive Care Unit (T. M. Berger), Department of Neuropaediatrics (T. Schmitt-Mechelke, F. Bauder); Lugano: Regional Hospital Lugano, Department of Paediatrics (V. Pezzoli); Muensterlingen: Cantonal Hospital Muensterlingen, Department of Paediatrics (B. Erkert, A. Mueller); Neuchatel: Cantonal Hospital Neuchatel, Department of Paediatrics (M. Ecoffey); St. Gallen: Cantonal Hospital St. Gallen, Department of Neonatology (A. Malzacher), Children's Hospital St. Gallen, Neonatal and Paediatric Intensive Care Unit (J. P. Micallef), Department of Child Development (A. Lang-Dullenkopf); Winterthur: Cantonal Hospital Winterthur, Department of Neonatology (L. Hegi), Social Paediatrics Center (M. von Rhein); Zurich: University Hospital Zurich (USZ), Department of Neonatology (D. Bassler, R. Arlettaz), University Children's Hospital Zurich, Department of Neonatology (V. Bernet) and Child Development Center (B. Latal, G. Natalucci); Zollikerberg: Hospital Zollikerberg, Neonatology Clinic (M. Moenkhoff).

## Author Contributions

Mr. Adams performed the biostatistical evaluation and together with Dr. Natalucci was involved in study design, data collection, analysis and interpretation of the results and wrote, reviewed and revised the manuscript.

Prof. Berger and Bassler, Drs. Borradori-Tolsa, Bickle-Graz, Grunt, and Gerull, were involved in data collection, study design, analysis and interpretation of data and reviewed the manuscript.

All authors approved the final manuscript as submitted and agree to be accountable for all aspects of the work.

## Data sharing statement



1  
2  
3  
4  
5  
6  
7  
8  
9  
10  
11  
12  
13  
14  
15  
16  
17  
18  
19  
20  
21  
22  
23  
24  
25  
26  
27  
28  
29  
30  
31  
32  
33  
34  
35  
36  
37  
38  
39  
40  
41  
42  
43  
44  
45  
46  
47  
48  
49  
50  
51  
52  
53  
54  
55  
56  
57  
58  
59  
60

Additional data are available by emailing [mark.adams@usz.ch](mailto:mark.adams@usz.ch)

For peer review only

## References

- 1 Berger T, Bernet V, El Alama S, *et al.* Perinatal care at the limit of viability between 22 and 26 completed weeks of gestation in Switzerland. *Swiss Med Wkly* 2011;**141**. doi:10.4414/smw.2011.13280
- 2 Tyson JE, Stoll BJ. Evidence-based ethics and the care and outcome of extremely premature infants. *Clin Perinatol* 2003;**30**:363–87. doi:10.1016/S0095-5108(03)00028-9
- 3 Marlow N. The Elephant in the Delivery Room. *N Engl J Med* 2015;**372**:1856–7. doi:10.1056/NEJMe1502250
- 4 Rysavy MA, Li L, Bell EF, *et al.* Between-Hospital Variation in Treatment and Outcomes in Extremely Preterm Infants. *N Engl J Med* 2015;**372**:1801–11. doi:10.1056/NEJMoa1410689
- 5 Gallagher K, Martin J, Keller M, *et al.* European variation in decision-making and parental involvement during preterm birth. *Arch Dis Child - Fetal Neonatal Ed* 2014;**99**:F245–9. doi:10.1136/archdischild-2013-305191
- 6 Berger TM, Steurer MA, Bucher HU, *et al.* Retrospective cohort study of all deaths among infants born between 22 and 27 completed weeks of gestation in Switzerland over a 3-year period. *BMJ Open* 2017;**7**:e015179. doi:10.1136/bmjopen-2016-015179
- 7 Fischer N, Steurer MA, Adams M, *et al.* Survival rates of extremely preterm infants (gestational age <26 weeks) in Switzerland: impact of the Swiss guidelines for the care of infants born at the limit of viability. *Arch Dis Child - Fetal Neonatal Ed* 2009;**94**:F407–13. doi:10.1136/adc.2008.154567
- 8 Berger TM, Steurer MA, Woerner A, *et al.* Trends and centre-to-centre variability in survival rates of very preterm infants (<32 weeks) over a 10-year-period in Switzerland. *Arch Dis Child - Fetal Neonatal Ed* 2012;**97**:F323–8. doi:10.1136/fetalneonatal-2011-301008
- 9 Steurer MA, Adams M, Bacchetti P, *et al.* Swiss medical centres vary significantly when it comes to outcomes of neonates with a very low gestational age. *Acta Paediatr* 2015;**104**:872–9. doi:10.1111/apa.13047
- 10 Serenius F, Blennow M, Maršál K, *et al.* Intensity of Perinatal Care for Extremely Preterm Infants: Outcomes at 2.5 Years. *Pediatrics* 2015;**135**:e1163–72. doi:10.1542/peds.2014-2988
- 11 Marlow N, Bennett C, Draper ES, *et al.* Perinatal outcomes for extremely preterm babies in relation to place of birth in England: the EPICure 2 study. *Arch Dis Child - Fetal Neonatal Ed* 2014;**99**:F181–8. doi:10.1136/archdischild-2013-305555
- 12 Alleman BW, Bell EF, Li L, *et al.* Individual and Center-Level Factors Affecting Mortality Among Extremely Low Birth Weight Infants. *Pediatrics* 2013;**132**:e175–84. doi:10.1542/peds.2012-3707
- 13 Kollée L, Cuttini M, Delmas D, *et al.* Obstetric interventions for babies born before 28 weeks of gestation in Europe: results of the MOSAIC study. *BJOG Int J Obstet Gynaecol* 2009;**116**:1481–91. doi:10.1111/j.1471-0528.2009.02235.x

- 1  
2  
3 14 Schlapbach LJ, Adams M, Proietti E, *et al.* Outcome at two years of age in a Swiss national  
4 cohort of extremely preterm infants born between 2000 and 2008. *BMC Pediatr*  
5 2012;**12**:198. doi:10.1186/1471-2431-12-198  
6  
7 15 Adams M, Borradori-Tolsa C, Bickle-Graz M, *et al.* Follow-up assessment of high-risk  
8 newborns in Switzerland. *Paedriatrica* 2014;**25**:6–10.  
9  
10 16 Bayley N. *Bayley Scales of Infant Development. 2nd edition.* San Antonio (TX): : The  
11 Psychological Corporation 1993.  
12  
13 17 Bayley N. *Bayley scales of infant and toddler development. 3rd ed.* San Antonio (TX): :  
14 Psychological Corporation 2006.  
15  
16 18 Spittle AJ, Spencer-Smith MM, Eeles AL, *et al.* Does the Bayley-III Motor Scale at 2 years  
17 predict motor outcome at 4 years in very preterm children? *Dev Med Child Neurol*  
18 2013;**55**:448–52. doi:10.1111/dmcn.12049  
19  
20 19 Jary S, Whitelaw A, Walløe L, *et al.* Comparison of Bayley-2 and Bayley-3 scores at  
21 18 months in term infants following neonatal encephalopathy and therapeutic hypothermia.  
22 *Dev Med Child Neurol* 2013;**55**:1053–9. doi:10.1111/dmcn.12208  
23  
24 20 Johnson S, Moore T, Marlow N. Using the Bayley-III to assess neurodevelopmental delay:  
25 which cut-off should be used? *Pediatr Res* 2014;**75**:670–4. doi:10.1038/pr.2014.10  
26  
27 21 Griffiths R. *The Griffiths mental development scales. Association for Research in Infant and*  
28 *Child development.* Henley-on-Thames, UK: : The Test Agency 1996.  
29  
30 22 Rosenbaum P, Paneth N, Leviton A, *et al.* A report: the definition and classification of  
31 cerebral palsy April 2006. *Dev Med Child Neurol Suppl* 2007;**109**:8–14.  
32  
33 23 Palisano R, Rosenbaum P, Walter S, *et al.* Development and reliability of a system to  
34 classify gross motor function in children with cerebral palsy. *Dev Med Child Neurol*  
35 1997;**39**:214–23. doi:10.1111/j.1469-8749.1997.tb07414.x  
36  
37 24 Buuren S van, Groothuis-Oudshoorn K. mice: Multivariate Imputation by Chained Equations  
38 in R. *J Stat Softw* 2011;**45**.<http://www.jstatsoft.org/v45/i03> (accessed 18 Dec 2015).  
39  
40 25 Silva LK. Validity of the risk adjustment approach to compare outcomes. *Cad Saúde Pública*  
41 2003;**19**:287–95. doi:10.1590/S0102-311X2003000100032  
42  
43 26 R: a language and environment for statistical computing. GBIF.ORG.  
44 <http://www.gbif.org/resource/81287> (accessed 18 Dec 2015).  
45  
46 27 Adams M, Braun J, Bucher HU, *et al.* Comparison of three different methods for risk  
47 adjustment in neonatal medicine. *BMC Pediatr* 2017;**17**:106. doi:10.1186/s12887-017-0861-  
48 5  
49  
50 28 Leversen KT, Sommerfelt K, Elgen IB, *et al.* Prediction of outcome at 5 years from  
51 assessments at 2 years among extremely preterm children: A Norwegian national cohort  
52 study. *Acta Paediatr* 2012;**101**:264–70. doi:10.1111/j.1651-2227.2011.02504.x  
53  
54  
55  
56  
57  
58  
59  
60

- 1  
2  
3 29 Marlow N. Is survival and neurodevelopmental impairment at 2 years of age the gold  
4 standard outcome for neonatal studies? *Arch Dis Child Fetal Neonatal Ed* 2015;**100**:F82–4.  
5 doi:10.1136/archdischild-2014-306191  
6  
7 30 Håkansson S, Farooqi A, Holmgren PÅ, *et al.* Proactive Management Promotes Outcome in  
8 Extremely Preterm Infants: A Population-Based Comparison of Two Perinatal Management  
9 Strategies. *Pediatrics* 2004;**114**:58–64. doi:10.1542/peds.114.1.58  
10  
11 31 Smith PB, Ambalavanan N, Li L, *et al.* Approach to Infants Born at 22 to 24 Weeks'  
12 Gestation: Relationship to Outcomes of More-Mature Infants. *Pediatrics* 2012;**129**:e1508–  
13 16. doi:10.1542/peds.2011-2216  
14  
15 32 Costeloe KL, Hennessy EM, Haider S, *et al.* Short term outcomes after extreme preterm  
16 birth in England: comparison of two birth cohorts in 1995 and 2006 (the EPICure studies).  
17 *BMJ* 2012;**345**:e7976. doi:10.1136/bmj.e7976  
18  
19  
20  
21  
22  
23  
24  
25  
26  
27  
28  
29  
30  
31  
32  
33  
34  
35  
36  
37  
38  
39  
40  
41  
42  
43  
44  
45  
46  
47  
48  
49  
50  
51  
52  
53  
54  
55  
56  
57  
58  
59  
60

## Figures

Figure 1. Study population overview

Figure 2. Odds ratios of outcome when born in a unit with high perinatal interventional activity

Legend: Odds ratios with 95% confidence interval of outcome when born in high activity units, crude or adjusted for GA, GA<sup>2</sup>, birth weight z-score, male sex, multiple births, outborn and socio-economic status. Dotted lines represent results received when using non-imputed data. AUC: area under receiver operator characteristic (ROC) curve representing predictive validity of risk adjustment.

Figure 3. Age at death in NICU (days)

Legend: Log-transformed age at death in NICU (days) for low and high activity centres in cohort A and cohort B. Crude y-axis scale on right hand side. Violin plot: box-plot with median, interquartile range and density (width = frequency). GA: gestational age. NICU: neonatal intensive care unit.

## Tables

**Table 1. Baseline characteristics cohorts A / B: children with and without 2-year follow-up**

|                              | <b>Cohort A (22 – 25 weeks GA)</b> |                     | <b>Cohort B (26 – 27 weeks GA)</b> |                   |
|------------------------------|------------------------------------|---------------------|------------------------------------|-------------------|
|                              | with FU                            | lost to FU          | with FU                            | lost to FU        |
| <b>N</b>                     | 319 (88.6%)                        | 41 (11.4%)          | 743 (82.9%)                        | 153 (17.1%)       |
| <b>Gestational age (iqr)</b> | 25.3 (24.7 to 25.6)                | 25 (24.6 to 25.6)   | 27 (26.4 to 27.4)                  | 27 (26.6 to 27.4) |
| <b>BW z-score (iqr)</b>      | -0.1 (-0.6 to 0.4)                 | -0.3 (-0.6 to 0.3)  | 0 (-0.7 to 0.5)                    | 0.2 (-0.5 to 0.5) |
| <b>Male sex</b>              | 53.9 %                             | 48.8 %              | 52.9 %                             | 56.2 %            |
| <b>Multiple births</b>       | 22.3 %                             | 26.8 %              | 26.8 %                             | 24.8 %            |
| <b>Outborn</b>               | 2.2 %                              | 9.8 %               | 4.2 %                              | 7.2 %             |
| <b>SES (iqr)</b>             | 6 (5 to 8)                         | 7 (4.2 to 10)       | 6 (4 to 8)                         | 6 (4 to 8)        |
| <b>Activity Score (iqr)</b>  | 87.5 (73.7 to 89.2)                | 84.1 (77.8 to 89.2) | 85.8 (84.2 to 91)                  | 88.7 (84.2 to 91) |
| <b>Major morbidity</b>       | 60.8 %                             | 53.7 %              | 39.9 %                             | 35 %              |

Legend: FU: follow-up; Iqr: interquartile range; SES: socio-economic status

**Table 2. Center activity grouping cohort A (standardized ratios)**

|                                             | C 1 | C 2 | C 3 | C 4 | C 5  | C 6  | C 7  | C 8  | C 9  |
|---------------------------------------------|-----|-----|-----|-----|------|------|------|------|------|
| <b>Inborn [1]</b>                           | 95  | 98  | 94  | 96  | 96   | 99   | 100  | 96   | 97   |
| <b>Full course antenatal steroids [2]</b>   | 56  | 64  | 80  | 88  | 91   | 81   | 100  | 88   | 97   |
| <b>Caesarean section [3]</b>                | 44  | 81  | 67  | 50  | 88   | 100  | 93   | 97   | 93   |
| <b>Obstetric activity</b>                   | 66  | 83  | 82  | 80  | 94   | 96   | 100  | 96   | 98   |
| <b>Delivery room intubation or CPAP [4]</b> | 37  | 40  | 61  | 83  | 76   | 83   | 83   | 93   | 100  |
| <b>Surfactant &lt; 2 hours [5]</b>          | 44  | 39  | 51  | 35  | 73   | 82   | 84   | 97   | 100  |
| <b>Intensive care started [6]</b>           | 57  | 78  | 78  | 100 | 79   | 83   | 81   | 88   | 99   |
| <b>Admitted [7]</b>                         | 57  | 64  | 77  | 92  | 79   | 79   | 76   | 88   | 100  |
| <b>Neonatal activity</b>                    | 49  | 55  | 67  | 78  | 77   | 82   | 81   | 92   | 100  |
| <b>Activity score</b>                       | 57  | 68  | 74  | 78  | 84   | 88   | 89   | 93   | 98   |
| <b>Activity group</b>                       | low | low | low | low | high | high | high | high | high |

Legend: [1]-[3]: Key obstetric indicators; [4]-[7]: key neonatal indicators; C1 – C9: centres 1 – 9; CPAP: continuous pulmonary airway pressure.

**Table 3 Low vs. high activity centres cohorts A and B**

|                                           | <b>Cohort A (22 – 25 weeks GA)</b> |                        | <b>Cohort B (26 – 27 weeks GA)</b> |                      |
|-------------------------------------------|------------------------------------|------------------------|------------------------------------|----------------------|
|                                           | low activity                       | high activity          | low activity                       | high activity        |
| <b>N</b>                                  | 461 (49.7%)                        | 466 (50.3%)            | 554 (52.9%)                        | 493 (47.1%)          |
| <b>Gestational age (iqr)</b>              | 24.7<br>(24 to 25.3)               | 24.6<br>(23.6 to 25.3) | 26.9<br>(26.4 to 27.4)             | 27<br>(26.4 to 27.4) |
| <b>BW z-score (iqr)</b>                   | -0.3<br>(-0.8 to 0.3)              | -0.4<br>(-1 to 0.2)    | 0<br>(-0.7 to 0.5)                 | 0<br>(-0.8 to 0.5)   |
| <b>Male sex</b>                           | 51.6 %                             | 57.6 %                 | 52.1 %                             | 55.8 %               |
| <b>Multiple births</b>                    | 28.2 %                             | 27.5 %                 | 24.2 %                             | 28.2 %               |
| <b>Outborn</b>                            | 3.9 %                              | 2.1 %                  | 5.2 %                              | 3.4 %                |
| <b>SES (iqr)</b>                          | 6 (4 to 8)                         | 6 (5 to 8)             | 6 (4 to 8)                         | 6 (4 to 8)           |
| <b>Activity Score (iqr)</b>               | 68.1<br>(68.1 to 73.7)             | 89.2<br>(87.5 to 92.7) | 84.2<br>(83.3 to 85.8)             | 91<br>(90.2 to 92.3) |
| <b>Mortality</b>                          | 71.4 %                             | 51.1 %                 | 18.2 %                             | 10.1 %               |
| - Died in delivery room                   | 41.9 %                             | 34.1 %                 | 1.6 %                              | 1.8 %                |
| - NICU mortality                          | 29.5 %                             | 17 %                   | 16.6 %                             | 8.3 %                |
| <b>Death or NDI</b>                       | 78.2 %                             | 62.9 %                 | 30.3 %                             | 24.6 %               |
| <b>Any major morbidity (survivors)</b>    | 62.1 %                             | 58.7 %                 | 43.8 %                             | 34.2 %               |
| <b>Moderate to Severe NDI (survivors)</b> | 18.3 %                             | 18.6 %                 | 11.9 %                             | 14.3 %               |
| <b>Age at death in NICU (days) (iqr)</b>  | 4<br>(1.5 to 10.2)                 | 8<br>(1.5 to 18)       | 6<br>(3 to 14)                     | 13<br>(4 to 24)      |
| <b>Length of stay (days) (iqr)</b>        | 73.5 (4 to 101.8)                  | 100 (63 to 120)        | 79<br>(64 to 95)                   | 85<br>(72 to 97)     |

Legend: GA: gestational age; Iqr: interquartile range; SES: socio-economic score; NDI: neurodevelopmental impairment; NICU: neonatal intensive care unit.



**Table 4. Outcome at 2 years of age (corrected)**

|                                          | <b>Cohort A</b> | <b>Cohort B</b> | <b>All infants</b> |
|------------------------------------------|-----------------|-----------------|--------------------|
| <b>Survivors at 2-year Follow-up (N)</b> | 319             | 743             | 1062               |
| <b>Mean age at 2-year Follow-up (sd)</b> | 22.5 (3)        | 22.6 (3.1)      | 22.6 (3.1)         |
| <b>Outcome at 2-year Follow-up</b>       |                 |                 |                    |
| Favourable ND                            | 81.5 %          | 86.9 %          | 85.3 %             |
| Moderate-to-severe NDI                   | 18.5 %          | 13.1 %          | 14.7 %             |
| <b>No developmental test performed</b>   | 2.8 %           | 1.4 %           | 1.8 %              |
| <b>BSID-II</b>                           | 63 %            | 71.4 %          | 68.8 %             |
| Mean MDI (sd)                            | 87.3 (18.8)     | 89.9 (17.2)     | 89.2 (17.7)        |
| Mean-PDI (sd)                            | 85.1 (18.7)     | 88.1 (17.2)     | 87.3 (17.7)        |
| <b>GMDS</b>                              | 6.0 %           | 3.6 %           | 4.3 %              |
| Mean GMDS w/o motor (sd)                 | 84.2 (18.2)     | 83.7 (20.7)     | 83.9 (19.5)        |
| <b>Bayley-III</b>                        | 28.2 %          | 23.6 %          | 25.0 %             |
| Mean cognitive composite score (sd)      | 98.2 (16.3)     | 101.4 (13.8)    | 100.3 (14.7)       |
| Mean composite motor score (sd)          | 94.7 (15.2)     | 97 (13.4)       | 96.2 (14.0)        |
| <b>Cerebral palsy</b>                    | 7.5 %           | 6.1 %           | 6.5 %              |
| GMFCS 1                                  | 5.0 %           | 4.2 %           | 4.4 %              |
| GMFCS 2                                  | 1.3 %           | 0.8 %           | 0.9 %              |
| GMFCS 3-5                                | 0.6 %           | 1.1 %           | 0.9 %              |
| <b>Severe visual problems</b>            | 0.0 %           | 0.3 %           | 0.2 %              |
| <b>Severe hearing problems</b>           | 1.7 %           | 0.7 %           | 1 %                |

Legend: Cohort A: 22 0/7 to 25 6/7 weeks gestation; cohort B: 26 0/7 to 27 6/7 weeks gestation; BSID-II: Bayley Scales of Infant Development, 2nd ed.; BSID-III / B-III: Bayley Scales of Infant and Toddler Development, 3rd ed.; Favourable ND: favourable neurodevelopment, i.e. absence of any NDI. FU: follow-up; GMDS: Griffiths Mental Developmental Scales; GMFCS: Gross Motor Function Classification System; MDI: Mental developmental index; N: number of; PDI: Psychomotor developmental index; sd: standard deviation.

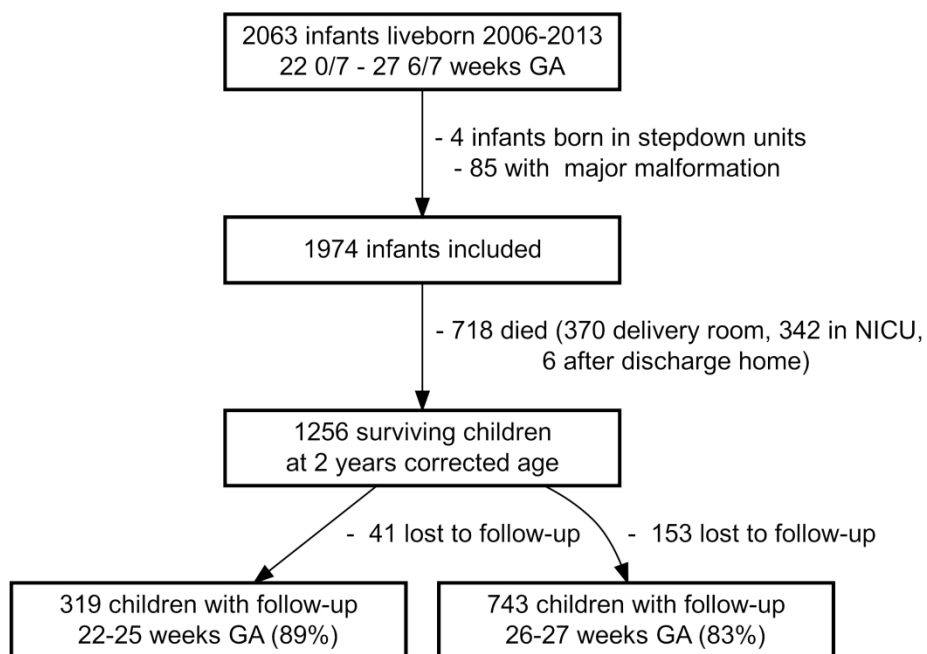

Figure 1 Study population overview

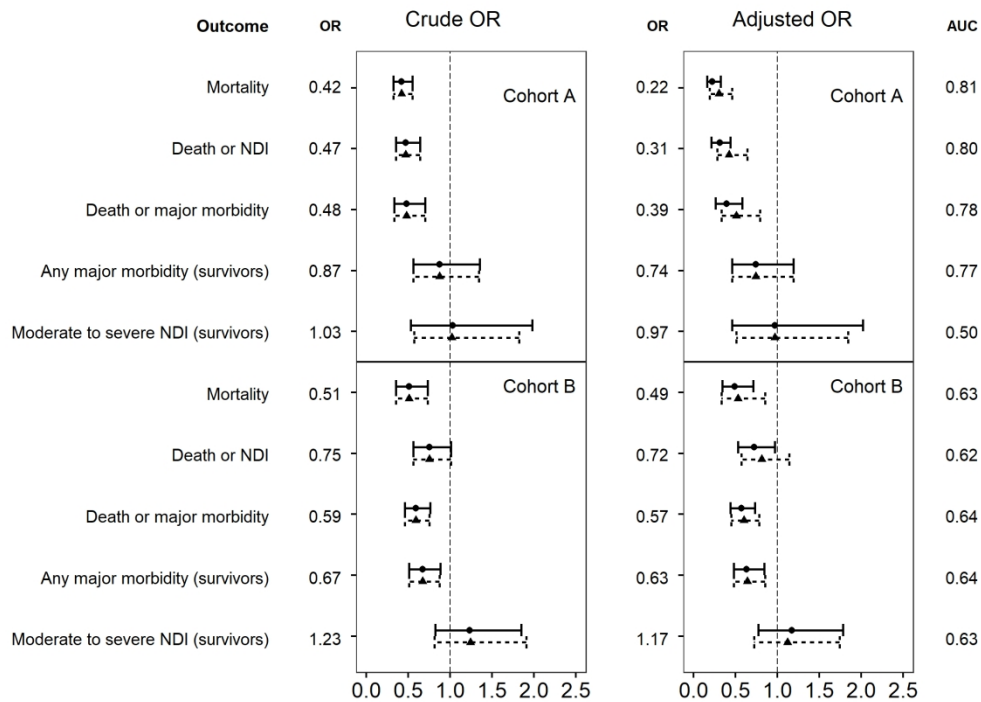

Figure 2. Odds ratios of outcome when born in a unit with high perinatal interventional activity

Legend: Odds ratios with 95% confidence interval of outcome when born in high activity units, crude or adjusted for GA, GA2, birth weight z-score, male sex, multiple births, outborn and socio-economic status. Dotted lines represent results received when using non-imputed data. AUC: area under receiver operator characteristic (ROC) curve representing predictive validity of risk adjustment.

199x149mm (300 x 300 DPI)

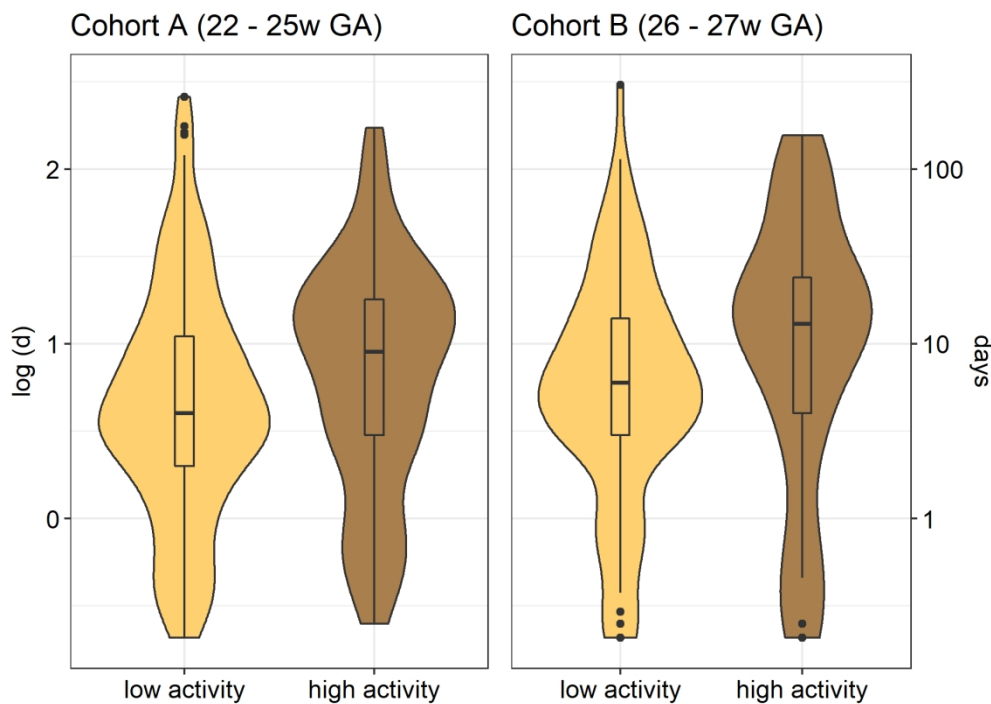

Figure 3. Age at death in NICU (days)

Legend: Log-transformed age at death in NICU (days) for low and high activity centres in cohort A and cohort B. Crude y-axis scale on right hand side. Violin plot: box-plot with median, interquartile range and density (width = frequency). GA: gestational age. NICU: neonatal intensive care unit.

169x119mm (300 x 300 DPI)

**Supplemental table 1. Center activity grouping cohort B (standardized ratios)**

|                                             | C4  | C1  | C2  | C3  | C6   | C5   | C7   | C9   | C8   |
|---------------------------------------------|-----|-----|-----|-----|------|------|------|------|------|
| <b>Inborn [1]</b>                           | 94  | 99  | 98  | 97  | 95   | 100  | 100  | 98   | 100  |
| <b>Full course antenatal steroids [2]</b>   | 74  | 86  | 90  | 94  | 88   | 90   | 86   | 100  | 84   |
| <b>Sectio [3]</b>                           | 76  | 88  | 84  | 80  | 91   | 100  | 82   | 89   | 77   |
| <b>Obstetric activity</b>                   | 84  | 94  | 94  | 93  | 94   | 100  | 92   | 99   | 90   |
| <b>Delivery room intubation or CPAP [4]</b> | 68  | 50  | 60  | 71  | 75   | 76   | 87   | 81   | 100  |
| <b>Surfactant &lt; 2 h [5]</b>              | 19  | 54  | 54  | 58  | 72   | 63   | 89   | 76   | 100  |
| <b>IC started [6]</b>                       | 100 | 98  | 99  | 98  | 99   | 98   | 98   | 100  | 100  |
| <b>Admitted [7]</b>                         | 98  | 100 | 98  | 99  | 98   | 98   | 97   | 100  | 100  |
| <b>Neonatal Activity</b>                    | 72  | 76  | 78  | 81  | 86   | 84   | 93   | 89   | 100  |
| <b>Activity Score</b>                       | 76  | 83  | 84  | 86  | 89   | 90   | 91   | 92   | 93   |
| <b>Activity group</b>                       | low | low | low | low | high | high | high | high | high |

Legend: [1]-[3]: Key obstetric indicators; [4]-[7]: key neonatal indicators; C1 – C9: centers 1 – 9; CPAP: continuous pulmonary airway pressure.

STROBE Statement—Checklist of items that should be included in reports of *cohort studies*

|                              | Item No | Recommendation                                                                                                                                                                                                                                                                                                                                                                                                                                                                                                                                           |
|------------------------------|---------|----------------------------------------------------------------------------------------------------------------------------------------------------------------------------------------------------------------------------------------------------------------------------------------------------------------------------------------------------------------------------------------------------------------------------------------------------------------------------------------------------------------------------------------------------------|
| <b>Title and abstract</b>    | 1       | (a) Indicate the study's design with a commonly used term in the title or the abstract<br>- mentioned in the abstract (design)<br>(b) Provide in the abstract an informative and balanced summary of what was done and what was found<br>- done                                                                                                                                                                                                                                                                                                          |
| <b>Introduction</b>          |         |                                                                                                                                                                                                                                                                                                                                                                                                                                                                                                                                                          |
| Background/rationale         | 2       | Explain the scientific background and rationale for the investigation being reported<br>- done (see introduction)                                                                                                                                                                                                                                                                                                                                                                                                                                        |
| Objectives                   | 3       | State specific objectives, including any prespecified hypotheses<br>- done (see introduction)                                                                                                                                                                                                                                                                                                                                                                                                                                                            |
| <b>Methods</b>               |         |                                                                                                                                                                                                                                                                                                                                                                                                                                                                                                                                                          |
| Study design                 | 4       | Present key elements of study design early in the paper<br>- done (see article summary, introduction, methods )                                                                                                                                                                                                                                                                                                                                                                                                                                          |
| Setting                      | 5       | Describe the setting, locations, and relevant dates, including periods of recruitment, exposure, follow-up, and data collection<br>- done (see methods)                                                                                                                                                                                                                                                                                                                                                                                                  |
| Participants                 | 6       | (a) Give the eligibility criteria, and the sources and methods of selection of participants. Describe methods of follow-up<br>- done (see methods – study population)<br>(b) For matched studies, give matching criteria and number of exposed and unexposed<br>- NA                                                                                                                                                                                                                                                                                     |
| Variables                    | 7       | Clearly define all outcomes, exposures, predictors, potential confounders, and effect modifiers. Give diagnostic criteria, if applicable<br>- done (see methods)                                                                                                                                                                                                                                                                                                                                                                                         |
| Data sources/<br>measurement | 8*      | For each variable of interest, give sources of data and details of methods of assessment (measurement). Describe comparability of assessment methods if there is more than one group<br>- done (see methods)                                                                                                                                                                                                                                                                                                                                             |
| Bias                         | 9       | Describe any efforts to address potential sources of bias<br>- done (see methods – outcome / data completeness / statistical methods)                                                                                                                                                                                                                                                                                                                                                                                                                    |
| Study size                   | 10      | Explain how the study size was arrived at<br>- done (see methods – study population)                                                                                                                                                                                                                                                                                                                                                                                                                                                                     |
| Quantitative variables       | 11      | Explain how quantitative variables were handled in the analyses. If applicable, describe which groupings were chosen and why<br>- done (see methods – outcome definitions / data completeness / statistical methods)                                                                                                                                                                                                                                                                                                                                     |
| Statistical methods          | 12      | (a) Describe all statistical methods, including those used to control for confounding<br>- done (see methods – statistical methods)<br>(b) Describe any methods used to examine subgroups and interactions<br>- done (see methods – statistical methods)<br>(c) Explain how missing data were addressed<br>- done (see methods – data completeness)<br>(d) If applicable, explain how loss to follow-up was addressed<br>- done (see methods – data completeness)<br>(e) Describe any sensitivity analyses<br>- done (see methods – statistical methods) |

1

**Results**

2

3

4

5

6

7

8

9

10

11

12

13

14

15

16

17

18

19

20

21

22

23

24

25

26

27

28

29

30

31

32

33

34

35

36

37

38

39

40

41

42

43

44

45

46

47

48

49

50

51

52

53

54

55

56

57

58

59

60

61

62

63

64

65

66

67

68

69

70

71

72

73

74

75

76

77

78

79

80

| <b>Results</b>           |     |                                                                                                                                                                                                                                                  |
|--------------------------|-----|--------------------------------------------------------------------------------------------------------------------------------------------------------------------------------------------------------------------------------------------------|
| Participants             | 13* | (a) Report numbers of individuals at each stage of study—eg numbers potentially eligible, examined for eligibility, confirmed eligible, included in the study, completing follow-up, and analysed<br>- done (see results)                        |
|                          |     | (b) Give reasons for non-participation at each stage<br>- done (results – study population)                                                                                                                                                      |
|                          |     | (c) Consider use of a flow diagram<br>- done (Figure 1)                                                                                                                                                                                          |
| Descriptive data         | 14* | (a) Give characteristics of study participants (eg demographic, clinical, social) and information on exposures and potential confounders<br>- done (see results, flow-chart, discussion, tables)                                                 |
|                          |     | (b) Indicate number of participants with missing data for each variable of interest<br>- done (see methods – data completeness)                                                                                                                  |
|                          |     | (c) Summarise follow-up time (eg, average and total amount)<br>- done (Table 4)                                                                                                                                                                  |
| Outcome data             | 15* | Report numbers of outcome events or summary measures over time<br>- done (see results)                                                                                                                                                           |
| Main results             | 16  | (a) Give unadjusted estimates and, if applicable, confounder-adjusted estimates and their precision (eg, 95% confidence interval). Make clear which confounders were adjusted for and why they were included<br>- done (see methods and results) |
|                          |     | (b) Report category boundaries when continuous variables were categorized<br>- done (see methods – perinatal interventional activity score)                                                                                                      |
|                          |     | (c) If relevant, consider translating estimates of relative risk into absolute risk for a meaningful time period<br>- NA: cohort study setting required calculation of odds ratios.                                                              |
| Other analyses           | 17  | Report other analyses done—eg analyses of subgroups and interactions, and sensitivity analyses<br>- done (see results and discussion)                                                                                                            |
| <b>Discussion</b>        |     |                                                                                                                                                                                                                                                  |
| Key results              | 18  | Summarise key results with reference to study objectives<br>- done (see discussion paragraph 1)                                                                                                                                                  |
| Limitations              | 19  | Discuss limitations of the study, taking into account sources of potential bias or imprecision. Discuss both direction and magnitude of any potential bias<br>- done (see article summary)                                                       |
| Interpretation           | 20  | Give a cautious overall interpretation of results considering objectives, limitations, multiplicity of analyses, results from similar studies, and other relevant evidence<br>- done (see discussion / conclusion)                               |
| Generalisability         | 21  | Discuss the generalisability (external validity) of the study results<br>- done (see discussion)                                                                                                                                                 |
| <b>Other information</b> |     |                                                                                                                                                                                                                                                  |
| Funding                  | 22  | Give the source of funding and the role of the funders for the present study and, if applicable, for the original study on which the present article is based<br>- done (see declarations – competing interests)                                 |

\*Give information separately for exposed and unexposed groups.

1 **Note:** An Explanation and Elaboration article discusses each checklist item and gives methodological background and  
2 published examples of transparent reporting. The STROBE checklist is best used in conjunction with this article (freely  
3 available on the Web sites of PLoS Medicine at <http://www.plosmedicine.org/>, Annals of Internal Medicine at  
4 <http://www.annals.org/>, and Epidemiology at <http://www.epidem.com/>). Information on the STROBE Initiative is  
5 available at <http://www.strobe-statement.org>.  
6  
7  
8  
9  
10  
11  
12  
13  
14  
15  
16  
17  
18  
19  
20  
21  
22  
23  
24  
25  
26  
27  
28  
29  
30  
31  
32  
33  
34  
35  
36  
37  
38  
39  
40  
41  
42  
43  
44  
45  
46  
47  
48  
49  
50  
51  
52  
53  
54  
55  
56  
57  
58  
59  
60



# BMJ Open

## Association between perinatal interventional activity and 2-year outcome of Swiss extremely preterm born infants: a population-based cohort study

|                                 |                                                                                                                                                                                                                                                                                                                                                                                                                                                                                                                                                                                                                                                                                                                                                                                     |
|---------------------------------|-------------------------------------------------------------------------------------------------------------------------------------------------------------------------------------------------------------------------------------------------------------------------------------------------------------------------------------------------------------------------------------------------------------------------------------------------------------------------------------------------------------------------------------------------------------------------------------------------------------------------------------------------------------------------------------------------------------------------------------------------------------------------------------|
| Journal:                        | <i>BMJ Open</i>                                                                                                                                                                                                                                                                                                                                                                                                                                                                                                                                                                                                                                                                                                                                                                     |
| Manuscript ID                   | bmjopen-2018-024560.R1                                                                                                                                                                                                                                                                                                                                                                                                                                                                                                                                                                                                                                                                                                                                                              |
| Article Type:                   | Research                                                                                                                                                                                                                                                                                                                                                                                                                                                                                                                                                                                                                                                                                                                                                                            |
| Date Submitted by the Author:   | 05-Oct-2018                                                                                                                                                                                                                                                                                                                                                                                                                                                                                                                                                                                                                                                                                                                                                                         |
| Complete List of Authors:       | Adams, Mark; Universitätsspital Zürich, Department of Neonatology; University Zurich, Epidemiology, Biostatistics and Prevention Institute<br>Berger, Thomas; Kinderspital Luzern, Neonatal and Paediatric Intensive Care Unit<br>Borradori-Tolsa, Cristina; Geneva University Hospital, Department of Paediatrics,<br>Bickle-Graz, Myriam; University Hospital Lausanne, Department Woman-Mother-Child<br>Grunt, Sebastian; Children's University Hospital, Inselspital, University of Bern, Division of Neuropaediatrics, Development and Rehabilitation<br>Gerull, Roland; University of Basel Children's Hospital (UKBB), Department of Neonatology<br>Bassler, Dirk; University Hospital Zurich, Department of Neonatology<br>Natalucci, Giancarlo; UniversitätsSpital Zurich, |
| <b>Primary Subject Heading</b>: | Paediatrics                                                                                                                                                                                                                                                                                                                                                                                                                                                                                                                                                                                                                                                                                                                                                                         |
| Secondary Subject Heading:      | Obstetrics and gynaecology                                                                                                                                                                                                                                                                                                                                                                                                                                                                                                                                                                                                                                                                                                                                                          |
| Keywords:                       | NEONATOLOGY, Fetal medicine < OBSTETRICS, Neonatal intensive & critical care < INTENSIVE & CRITICAL CARE, Quality in health care < HEALTH SERVICES ADMINISTRATION & MANAGEMENT                                                                                                                                                                                                                                                                                                                                                                                                                                                                                                                                                                                                      |
|                                 |                                                                                                                                                                                                                                                                                                                                                                                                                                                                                                                                                                                                                                                                                                                                                                                     |

SCHOLARONE™  
Manuscripts

## Association between perinatal interventional activity and 2-year outcome of Swiss extremely preterm born infants: a population-based cohort study

Mark Adams MSc<sup>1,2,3</sup>, Professor Thomas M. Berger MD<sup>2</sup>, Cristina Borradori-Tolsa MD<sup>4</sup>, Myriam Bickle-Graz MD<sup>5</sup>, Sebastian Grunt MD<sup>6</sup>, Roland Gerull MD<sup>7</sup>, Professor Dirk Bassler MD, MSc<sup>1</sup>, and Giancarlo Natalucci MD<sup>1,2,8</sup> for the Swiss Neonatal Network & Follow-Up Group

### AFFILIATIONS

<sup>1</sup>Department of Neonatology, University of Zurich and Zurich University Hospital, Zurich, Switzerland;

<sup>2</sup>Swiss Neonatal Network & Follow-up Group, Zurich, Switzerland;

<sup>3</sup>Epidemiology, Biostatistics and Prevention Institute, University of Zurich, Zurich, Switzerland;

<sup>4</sup>Department of Paediatrics, Geneva University Hospital, Geneva, Switzerland;

<sup>5</sup>Clinic of Neonatology, Department Woman-Mother-Child, University Hospital Lausanne, Lausanne, Switzerland;

<sup>6</sup>Division of Neuropaediatrics, Development and Rehabilitation, Children's University Hospital, Inselspital, University of Bern, Bern, Switzerland;

<sup>7</sup>Department of Neonatology, University of Basel Children's Hospital (UKBB), Basel, Switzerland;

<sup>8</sup>Child Development Center, University Children's Hospital Zurich, Zurich, Switzerland.

### CORRESPONDING AUTHOR

Mark Adams, Department of Neonatology, University Hospital Zurich, Frauenklinikstrasse 10, 8091 Zurich, Switzerland; Tel. +4144 556 3034; mark.adams@usz.ch.

### Short title

Perinatal intervention activity affects 2-year outcome

### Financial Disclosure Statement

Mark Adams receives a salary as network coordinator for the Swiss Neonatal Network. Giancarlo Natalucci received financial support by the Swiss National Science Foundation; grant PZOO3\_161146. The remaining authors have indicated they have no financial relationships relevant to this article to disclose.

### Funding

The authors received no specific funding for this work. The sponsors were not involved in the following matters: study design; collection, analysis, and interpretation of data; writing of the report; and the decision to submit the manuscript for publication.

### Conflict of Interest Statement

Potential Conflicts of Interest: Mark Adams receives a salary as network coordinator for the Swiss Neonatal Network. The remaining authors have indicated they have no potential conflicts of interest relevant to this article to disclose.

### List of abbreviations

1  
2  
3  
4 aOR: adjusted odds ratio; AUC: area under receiver operator characteristic (ROC) curve;  
5 BSIDII: Bayley Scales of Infant Development, second edition; Bayley-III: Bayley Scales of  
6 Infant and Toddler Development, Third edition; BPD: bronchopulmonary dysplasia; CI:  
7 confidence interval; cPVL: cystic periventricular leukomalacia; GA: gestational age; GMDS:  
8 Griffith scales of Infant Development; GMFCS: Gross Motor Function Classification System;  
9 IVH: intraventricular haemorrhage; LOS: late onset sepsis; NDI: neurodevelopment impairment;  
10 NEC: necrotizing enterocolitis; NICHD NRN: national institute of child health neonatal research  
11 network; ROP: retinopathy of prematurity; SD: standard deviation; SES: socio-economic status;  
12 SNN: Swiss Neonatal Network & Follow-up Group.  
13

## 14 ABSTRACT

15 **Objectives:** To investigate if centre-specific levels of perinatal interventional activity were  
16 associated with neonatal and neurodevelopmental outcome at two years of age in two separately  
17 analysed cohorts of infants: cohort A born at 22 to 25, and cohort B born at 26 to 27 gestational  
18 weeks, respectively.  
19

20 **Design:** Geographically defined, retrospective cohort study.

21 **Setting:** All nine level III perinatal centres (neonatal intensive care units (NICUs) and affiliated  
22 obstetrical services) in Switzerland.

23 **Patients:** All live-born infants in Switzerland in 2006-2013 below 28 gestational weeks,  
24 excluding infants with major congenital malformation.

25 **Outcome measures:** Outcomes at 2 years corrected for prematurity were mortality, survival  
26 with any major neonatal morbidity, and with severe-to-moderate neurodevelopmental  
27 impairment (NDI).  
28

29 **Results:** Cohort A associated birth in a centre with high perinatal activity with low mortality  
30 (aOR: 0.22; 95% confidence interval: 0.16-0.32), while no association was observed with  
31 survival with major morbidity (aOR: 0.74; 95% confidence interval: 0.46-1.19), and with NDI  
32 (aOR: 0.97; 95% confidence interval: 0.46-2.02). Median age at death (8 versus 4 days) and  
33 length of stay (100 versus 73 days) were higher in high than in low activity centres. The results  
34 for cohort B mirrored those for cohort A.

35 **Conclusions:** Centres with high perinatal activity in Switzerland have a significantly lower risk  
36 for mortality while having comparable outcomes among survivors. This confirms results of other  
37 studies but in a geographically defined area applying a more restrictive approach to initiation of  
38 perinatal intensive care than previous studies. The study adds that infants up to 28 weeks  
39 benefited from a higher perinatal activity and why further research is required to better estimate  
40 the added burden on children who ultimately do not survive.  
41

## 42 Strengths and limitations of this study

- 43
- 44 • Geographically defined cohort study comparing 2-year outcome of extremely preterm  
45 infants between hospitals with high and low perinatal interventional activity based on a  
46 quantitative score of 3 obstetric and 4 neonatal indicators.
  - 47 • Crude and risk-adjusted odds ratios for outcome between high and low activity centres  
48 were calculated using regression models and measuring predictive validity of risk  
49 adjustment.
  - 50 • Missing outcome data of surviving infants lost to follow-up were addressed by multiple  
51 imputation and the validity of data imputation was tested by sensitivity analysis using  
52 non-imputed data.
  - 53 • The interrelatedness of some of the perinatal activity score components (e.g. surfactant  
54 and respiratory support) form a limitation. However, our aim was to quantify activity and  
55 not measure quality of care. As such, the components quantify at best the level of  
56  
57  
58  
59

1  
2  
3 proactive care by focusing on the whole repertoire of first perinatal supportive  
4 interventions.

- 5 • Further minor limitations are represented by the composite nature of the outcome  
6 measures "any major morbidity" and "neurodevelopmental impairment", which could  
7 have led to a loss of information.  
8

9  
10 **Keywords**

11 Extremely preterm, limit of viability, perinatal intervention, mortality, morbidity, 2 year outcome  
12

13 **Word count**

14 3239  
15  
16  
17  
18  
19  
20  
21  
22  
23  
24  
25  
26  
27  
28  
29  
30  
31  
32  
33  
34  
35  
36  
37  
38  
39  
40  
41  
42  
43  
44  
45  
46  
47  
48  
49  
50  
51  
52  
53  
54  
55  
56  
57  
58  
59  
60

For peer review only

## INTRODUCTION

Over recent decades, progress in perinatal care has led to vastly improved survival rates for infants born at extremely low gestational age (GA). Consequently, the GA limit for initiating life-sustaining intensive care at birth was lowered to 22 weeks, below which treatment is generally not recommended.[1] This however raised ethical concerns regarding the added burden to infants who ultimately do not survive and the increased risk of neurosensory impairment among those that do survive.[2] There is little consensus about the policy of treating these infants. Instead, hospital practices regarding the initiation of intensive care have dramatically influenced rates of survival and survival without impairment.[3] This has led to large outcome variation among hospitals. In 2015, Rysavy et al. quantified the effect of perinatal interventional activity on outcome between a group of 24 centres of the NICHD NR network in the United States. Among infants born at 22-23 weeks gestation, centre rates of active treatment accounted for 78% of the variation in survival between centres. For those born at 24 weeks gestation it accounted for 22% of the variation.[4] There is a similar variation in decision making approaches in Europe, which appears to reflect local philosophy and practice rather than economic or demographic markers, individual variations in health expenditure or rates of preterm birth.[5] Swiss obstetricians and neonatologists are known to be generally restrictive with regards to initiation of intensive care for infants at the limit of viability. A recent study revealed that the decision-making regarding initiation of treatment was based almost exclusively on gestational age (GA) and that most infants born < 24 weeks gestation received a priori comfort care.[6] Nevertheless, centre-to-centre outcome variability has repeatedly been reported and is assumed to be in part associated with the local ethical decision making.[7-9] What remained unclear was whether the lower mortality in some centres lead to higher risk of neurodevelopmental impairment (NDI) in survivors.

This study aimed to quantify the outcome differences between centres with a higher propensity towards providing active perinatal care at birth from those that provide more a priori comfort

1  
2  
3 care. We assessed infants in cohort A (22+0 to 25+6 weeks gestational age (GA)) and compared  
4  
5 their outcome variability with that in cohort B (26+0 to 27+6 weeks GA) where we expected no  
6  
7 difference in either perinatal care provision or outcome based on previous studies.[4,10–13]  
8  
9

## 10 11 **METHODS**

### 12 13 **Study population and procedure**

14  
15 Geographically defined, retrospective cohort study including all live born infants between 22+0  
16  
17 to 27+6 weeks of gestation in Switzerland from 2006-2013. We excluded infants born with a  
18  
19 major congenital malformation, defined as being the primary cause of death or requiring surgery  
20  
21 or a chromosomal anomaly. We also excluded 4 infants born and treated exclusively in 3  
22  
23 stepdown units. We extracted electronically recorded data (challenged for plausibility and  
24  
25 completeness) from the prospective national database of the Swiss Neonatal Network & Follow-  
26  
27 up Group (SNN). Data from delivery room deaths were audited by a researcher visiting the  
28  
29 hospitals' maternity wards.  
30  
31

32  
33  
34  
35 Data collection and evaluation for this study has been approved by the institutional ethical  
36  
37 review board (KEK-ZH-Nr 2014-0552). Participating centres were obliged to inform parents  
38  
39 about the scientific use of anonymized data.  
40  
41

### 42 43 **Neonatal data**

44  
45 Perinatal and neonatal variables were defined as follows: GA as the best estimate available based  
46  
47 on prenatal ultrasound examination during the first trimester of pregnancy. Birth weight z-scores,  
48  
49 intraventricular haemorrhage grade 3 or higher (IVH), cystic periventricular leukomalacia  
50  
51 (cPVL), bronchopulmonary dysplasia (BPD), severe retinopathy of prematurity stages 3-4  
52  
53 (ROP), necrotizing enterocolitis (NEC), late onset neonatal sepsis (LOS), and Socioeconomic  
54  
55 status (SES) were defined as previously published.[14]  
56  
57  
58  
59

### **Neurodevelopmental outcome at 2 years of age**

Experienced neuro- or developmental paediatricians performed the standardized Swiss follow-up assessment[15] at 18-24 months corrected age in one of the Swiss follow-up centres. Between 2006 and 2012, examinations were based on Bayley Scales of Infant Development, 2. edition (BSID-II)[16] and afterwards on Bayley scales of infant and toddler development, 3. edition (Bayley-III).[17] Up until 2006, some of the children were tested using the Griffiths mental development scales-Revised (GMDS)[18] during the transition period to BSID-II. According to recent literature,[19–22] Bayley-III scores below 85 (-1SD) were considered as equivalent of indices below 70 (-2SD) in the BSID-II and the GMDS. The GMDS development quotient were considered equivalent to BSID-II MDI.[23] Infants with significant disability precluding completion of the development test were assigned a development score of 1 below -3SD. Cerebral palsy was defined according to Rosenbaum[24] and was graded according to the Gross Motor Function Classification System (GMFCS) For Children Aged  $\leq 2$  Years.[25] Vision and hearing were assessed by either direct examination or caregiver report.

### **Perinatal interventional activity score**

In order to differentiate between Swiss centres with a higher propensity to initiate intensive care for infants born below 26 weeks gestation we calculated a perinatal activity score per centre based on the model presented by Serenius et al. in 2015.[10] Obstetric and neonatal activity scores reflecting the intensity of care in each centre were calculated on the basis of the rates of 3 key obstetric indicators (delivery at level III hospitals, i.e. inborn; complete course of antenatal steroids; caesarean section), and 4 key neonatal indicators (surfactant within 2 hours after birth; any of the following activities in the delivery room: bag/mask ventilation, continuous positive airway pressure, endotracheal intubation, epinephrine or adrenaline supply, cardiac compression; no recorded decision for primary non-intervention in the delivery room [available for all infants];

1  
2 infants admitted for intensive care [out of infants alive at 30 minutes after birth]). The mean  
3 obstetric and neonatal activity scores comprised the perinatal activity score (henceforth, activity  
4 score). Each step included normalization by assigning the centre with the highest rate for each  
5 indicator a score of 100; the remaining centres were assigned proportional scores. We calculated  
6 an activity score for infants born between 22-25 weeks gestation (cohort A) and a separate one  
7 for infants born 26-27 weeks gestation (cohort B). The first score was used to classify the nine  
8 Swiss perinatal centres into a “low” and a “high” activity group using the arbitrary threshold of  
9 an activity score of 80 in order to generate two groups of similar size with clear difference in  
10 perinatal activity. To allow comparison between cohort A and cohort B, cohort B was split into  
11 the same centres with low and high activity as for cohort A. To confirm the dichotomous  
12 association of perinatal activity with outcome, we also tested for a linear association. For this, we  
13 generated a variable that increases by one for every 5-point increase in perinatal activity using  
14 the two perinatal activity scores for cohort A and B.

### 33 Outcome

34 Outcome parameters were defined as follows: mortality at 2 years corrected age, death or  
35 moderate-to-severe NDI, death or major morbidity, survival with moderate-to-severe NDI, and  
36 survival with major morbidity. Moderate-to-severe NDI was defined as either mental or motor  
37 development index below 70 (-2SD) in the BSID-II; cognitive or motor composite score below  
38 85 (see below) in the Bayley-III; a global score of the GMDS below 70 (-2SD); cerebral palsy  
39 with GMFCS above 1; the absence of useful hearing even with aids (i.e. >90dB hearing level);  
40 blindness or only perception of light. Major morbidities encompassed IVH, cPVL, BPD, ROP,  
41 NEC or LOS.



### Data completeness

Patient population coverage was assessed by comparison with the birth registry of the Swiss Federal Statistical Office and yielded 86.4% of all live births between 22-27 weeks gestation. 1.2% of the datasets were missing information on "major morbidity" and were therefore eliminated in the non-imputed analyses including this outcome. Other data was missing in less than 0.1% of cases. As 2-year follow-up data was missing in 11% of all surviving infants between 22-25 weeks gestation and 17% between of 26-27 weeks gestation, we performed a fivefold imputation with chained equations for the cohorts A (all infants), A (survivors), B (all infants) and B (survivors), respectively, allowing the calculation of pooled adjusted odds ratios (aOR) for the above listed outcomes.[26] Data for imputation were determined as missing at random. As a sensitivity analysis, we performed the same tests with crude, i.e. non-imputed data. As outborn infants were by concept unevenly distributed between high and low activity centers, they cannot be assumed to missing at random for the imputation. We therefore performed another sensitivity analysis excluding all outborn infants for both the activity score as well as for the regression analysis.

### Statistical analysis

We performed multivariable adjusted logistic regression to compare outcome between centres with lower and higher perinatal activity. Adjustment was made for GA and GA<sup>2</sup> (as the combination better models the non-linear dependency of most neonatal outcomes on GA and therefore results in risk adjustment with higher predictive validity), birth weight z-score, male sex, multiple births, and socio-economic status. To estimate the validity of the adjustment, we calculated how well the variables listed above predicted outcome. If this predicted validity is low, the adjustment made has limited explanatory power.[27] We calculated the area under receiver operating characteristics curve (AUC). AUC values between 0.7-0.8 were considered to

1  
2  
3 represent moderate, and  $>0.8$  to represent high predictive validity, respectively. All statistical  
4  
5 analyses were performed using R Version 3.4.[28]  
6  
7

## 8 9 **RESULTS**

### 10 **Study population and neonatal data**

11  
12  
13  
14 A total of 2063 infants were born alive in Switzerland between 2006 and 2013 (Figure 1). 1839  
15  
16 of those infants were registered by SNN between 2007 to 2013. They correspond to 1900 life-births  
17  
18 registered at the Swiss Federal Statistical Office in the same time period which results in a population  
19  
20 coverage of 97% for the study period (reference data for 2006 were not available as GA was not included  
21  
22 in the national register prior to 2007). Of the 2063 infants we excluded 4 infants because they were  
23  
24 born in and treated at 3 stepdown units and 85 infants because of major congenital  
25  
26 malformations. Among the 1974 included infants, 712 (36%) died before discharge and 6 (0.3%)  
27  
28 after discharge but before reaching two years of age. In cohorts A and B, 319 (89% of survivors)  
29  
30 and 743 (83%) were assessed at 2 years corrected age, respectively. 194 (15%) children were lost  
31  
32 to follow-up (109 refused follow-up, 57 could not be reached/moved away, 28 unknown loss to  
33  
34 follow-up). In both cohorts, difference between baseline characteristics of children with and  
35  
36 without follow-up was negligible (Table 1), particularly concerning the factor “activity score”  
37  
38 which determines the comparison groups for the subsequent analysis. Outborn children were less  
39  
40 frequently assessed in both cohorts.  
41  
42  
43  
44  
45

### 46 **Perinatal interventional activity score**

47  
48 Table 2 displays the proportion of infants receiving either of the treatments determining the  
49  
50 obstetrical activity (items [1] – [3]) and the neonatal activity (items [4] – [7]) for cohort A in  
51  
52 each centre. Activity scores were determined out of the mean of the obstetric and neonatal  
53  
54 activity scores and ranged from 57 to 98. Four centres with an activity score  $< 80$  were classified  
55  
56 as “low activity centres” encompassing 461 infants in cohort A and 554 in cohort B. The  
57  
58  
59

1  
2  
3 remaining five centres were classified as “high activity centres” and combined 466 infants in  
4 cohort A and 493 in cohort B. A separate centre specific activity score was determined for cohort  
5 B using the same routine (supplemental Table 1). Each 5-point increase in perinatal activity  
6 score reduced the risk for mortality within two years of life for cohort A (aOR: 0.74, 95%  
7 confidence interval [CI] 0.68-0.80) and cohort B (aOR: 0.82, 95% CI 0.70 to 0.97).

15 After risk adjustment, the aOR in cohort A for mortality (0.22, 95% CI 0.15-0.31) and death or  
16 NDI (0.30, 95% CI 0.21-0.42) were significantly lower (Figure 2) for high compared to low  
17 activity centres. After restricting the cohort to survivors, aOR for any major neonatal morbidities  
18 was 0.75 (95% CI 0.47-1.19) and for moderate to severe NDI 0.95 (95% CI 0.46-1.98). The  
19 crude baseline characteristics of low versus high activity centres in cohort A (Table 3) were  
20 comparable for size, GA range, birth weight z-score, multiple births and SES. However, High  
21 activity centres had more male infants and less outborn infants. The crude outcome proportions  
22 reflect the aOR results. Repeating the same evaluation using non-imputed data resulted in almost  
23 the same point-estimates and confidence intervals (dotted lines in Figure 2). As outborn infants  
24 were unevenly distributed between children with and without follow-up, we repeated the analysis  
25 excluding all 75 outborn infants from the beginning for both the activity score and the regression  
26 analysis. The resulting aOR were almost equivalent to the ones reported above (supplemental  
27 Figure 1). Excluding the delivery room deaths, median NICU age at death in high activity  
28 centres was higher (8 versus 4 days) as was length of stay (100 versus 73 days). As can be seen  
29 in Figure 3, the distribution of age at death was different between high and low activity centres.  
30 In high activity centres, the highest density was reached above the median, whereas it was below  
31 the median in low activity centres. The violin plot thereby allows taking the full distribution of  
32 the data into account rather than relying on median and interquartile range alone.

Centres classified as having “high activity” for cohort A, still had a higher perinatal activity score (91 vs. 84) in cohort B with matching outcome variability. aOR for mortality (0.49, 95% CI 0.34-0.71) and death or NDI (0.72, 95% CI 0.53-0.97) were significantly lower in high activity centres (Figure 2). In contrast to cohort A the aOR for any major morbidities was also significantly lower (0.63, 95% CI 0.48-0.84) whereas moderate to severe NDI outcome in survivors was higher without reaching significance (1.17, 95% CI 0.77-1.78). Again, crude baseline characteristics (Table 3) were comparable with more male and fewer outborn infants in high activity centres. Crude outcomes mirror the aOR result. In cohort B, median age at death in NICU in high activity centres was again higher (11 versus 6 days), whereas length of stay was only somewhat longer (85 versus 78 days).

### **Neurodevelopmental outcome at 2 years of age**

Follow-up assessment was performed at a mean (SD) corrected age of 22.6 (3.1) months (Table 4). Of 1062 examined children, 729 (69%), 265 (25%), and 46 (4%) were assessed with the Bayley-II, Bayley-III, and GMDS, respectively while in 19 (2%) children only a part of a developmental assessment could be performed because of severe cerebral palsy or poor compliance. 220 (21%) infants suffered from moderate-to-severe NDI and 842 (79%) infants showed favourable outcome.

### **DISCUSSION**

Swiss perinatal centres with a higher score of perinatal activity for infants at the borderline of viability (cohort A) had significantly lower aOR for mortality and for the composite outcome death or NDI. After restricting the cohort to survivors at two years of age corrected for prematurity, there was no significant difference between centres with high and low intensity regarding risk for major morbidity or NDI. Cohort B mirrored the outcome differences between high and low activity perinatal centres determined for cohort A, i.e. significantly lower aOR for

1  
2  
3 mortality and for death or NDI. In contrast to cohort A, the lower mortality in high activity  
4  
5 centres in cohort B was based exclusively on NICU mortality. High activity centres in cohort B  
6  
7 had a significantly lower aOR for any major neonatal morbidity. Except for the aOR for  
8  
9 mortality, death or NDI or any major morbidity in cohort A, the predictive validity measured by  
10  
11 AUC was low to negligible. For those aOR we would expect the true value to lie between the  
12  
13 crude and the adjusted level, which confirm the results.[29]  
14  
15

16  
17  
18 The association between perinatal interventional activity and outcome has been reported before.  
19  
20 We based our centre specific activity score on the model of the Swedish regional activity score  
21  
22 published by Serenius et al. (2015).[10] In their study, live-born infants between 22-24 weeks  
23  
24 GA treated in regions with high versus low activity also had lower aOR for mortality (0.43, 95%  
25  
26 CI: 0.26-0.73) and for death or NDI (aOR: 0.48, 95% CI: 0.27-0.84) at 2.5 years corrected age.  
27  
28 As in our study, survivors in high activity regions did not have a higher risk for any NDI (aOR:  
29  
30 0.63, 95% CI: 0.31-1.28). This reflects the difficulty in assessing outcome at 2 years in general  
31  
32 and using NDI as a measure of efficacy.[30,31] Other reports between intensity of care and  
33  
34 survival date back as far as 2004 when Hakansson et al. for the first time reported how a  
35  
36 proactive perinatal strategy increases the number of live births and improves the infant's  
37  
38 postnatal condition in Sweden.[32] Rysavy et al. were also able to show a clear association  
39  
40 between the outcome of infants receiving active care and those that did not for infants between  
41  
42 22-24 weeks GA, but not for those between 25-26 weeks GA.[4] A study determining the  
43  
44 perinatal outcome for extremely preterm infants in relation to place of birth in England reported  
45  
46 lower odds for mortality when they were born in a level 3 centre with higher perinatal activity  
47  
48 based on staffing and activity data collected by questionnaire.[11] In 2013, an NICHD study  
49  
50 could show that 'centre intervention rates' significantly predicted mortality rates for infants <25  
51  
52 weeks but not for infants  $\geq$  25 weeks gestation.[12] Centre intervention rates included parameters  
53  
54 similar or identical to the ones chosen for the calculation of the activity score in this study. Using  
55  
56  
57  
58  
59  
60

1  
2 yet another version of a similar intervention score, the MOSAIC study of 2009 was able to show  
3 an association between the score and mortality for infants <26 weeks but not for infants at 26 –  
4 27 weeks gestation.[13] Swiss centres rarely initiated intensive care below 24 weeks gestation  
5 during the study period.[6,8] This is why we chose the same GA ranges for cohorts A and B as  
6 the MOSAIC study but not as the other studies. Yet, even with the more restrictive approach we  
7 confirm the results of previous studies in infants < 26 weeks gestation.  
8  
9  
10  
11  
12  
13  
14  
15

16  
17  
18 Swiss centres classified as having “high activity” for cohort A still had a higher perinatal activity  
19 score in cohort B. In contrast to the studies reported above,[4,10–13] the resulting outcome  
20 variability in cohort B is congruent to the variability in cohort A. As variability in mortality in  
21 cohort B was exclusively observed in NICU- but not in delivery room-mortality, it is difficult to  
22 determine an association to either higher perinatal activity or quality of care, or a combination of  
23 both. Arguments exist for each: centres of the high activity group also have a higher perinatal  
24 activity score in cohort B and the continuous perinatal activity score reduces risk of mortality per  
25 each 5-point increase in activity score. As variability in mortality in cohort B exists exclusively  
26 for NICU and not for delivery room mortality, variability in the decision-making process  
27 regarding redirection of care based on futility may exist. On the other hand, centres with a high  
28 perinatal activity also had a significantly lower aOR for any major morbidities which would  
29 favour the assumption of difference in quality of care. This would be in line with the  
30 observations by Smith et al. whose findings suggest that the approach taken with infants at the  
31 limits of viability is associated with improved outcomes of more-mature infants.[33]  
32  
33  
34  
35  
36  
37  
38  
39  
40  
41  
42  
43  
44  
45  
46  
47  
48  
49

50 As reported in other studies,[10,34] median age at death was higher in high activity centres.  
51 Serenius et al. argue that the longer duration of life allows for a trial of life, whereas Costeloe et  
52 al. see the reason in different principle causes of death with a tendency towards later  
53 complications of prematurity in the case of the group of infants dying later.[10,34] Figure 3  
54  
55  
56  
57  
58  
59  
60

1  
2  
3 displays that the age at death for both cohorts are comparable in their interquartile range but,  
4  
5 together with the longer median length of stay for all infants, indicate an added burden to infants  
6  
7 who ultimately do not survive in high activity centres.  
8  
9

## 10 11 Conclusions

12  
13 A 5-point increase in perinatal interventional activity significantly decreases the aOR for  
14  
15 mortality of infants born 22-25 weeks gestation in Switzerland. High activity centres have a  
16  
17 significantly lower aOR for mortality and death or NDI and outcome among survivors at 2 years  
18  
19 of age is comparable. The effect observed was repeated for infants between 26-27 weeks  
20  
21 gestation, indicating that all extremely preterm infants benefited. Age at death and duration of  
22  
23 hospitalization are higher suggesting a higher burden for patients who ultimately do not survive  
24  
25 in high activity centres. Although the results favour the high activity approach, further research  
26  
27 is required to better estimate the accompanying added burden on the children. Outcome data at 5  
28  
29 years of age or later are urgently required to confirm these findings with a more predictive long-  
30  
31 term assessment.  
32  
33  
34  
35  
36  
37  
38  
39  
40  
41  
42  
43  
44  
45  
46  
47  
48  
49  
50  
51  
52  
53  
54  
55  
56  
57  
58  
59  
60



## Acknowledgements

We gratefully thank all children and their parents who participated in this study.

We also thank the following members of the Swiss Neonatal Network & Follow-Up Group for their non-author contributors:

Aarau: Cantonal Hospital Aarau, Children's Clinic, Department of Neonatology (Ph. Meyer, C. Anderegg), Department of Neuropaediatrics (A. Capone Mori, D. Kaeppli); Basel: University of Basel Children's Hospital (UKBB), Department of Neonatology (S. Schulzke), Department of Neuropaediatrics and Developmental Medicine (P. Weber); Bellinzona: San Giovanni Hospital, Department of Paediatrics (G.P. Ramelli, B. Goeggel Simonetti); Berne: University Hospital Berne, Department of Neonatology (M. Nelle), Department of Paediatrics (B. Wagner), Department of Neuropaediatrics (M. Steinlin, S. Grunt); Biel: Children's Hospital Wildermeth, Department of Pediatrics (M. Gebauer), Development and Paediatric Neurorehabilitation Center (R. Hassink); Chur: Children's Hospital Chur, Department of Neonatology (W. Bär), Department of Neuropaediatrics (E. Keller, Ch. Killer); Fribourg: Cantonal Hospital Fribourg, Department of Neuropaediatrics (K. Fuhrer); Geneva: Department of child and adolescent, University Hospital (HUG), Neonatology Units (R. E. Pfister), Division of Development and Growth (P. S. Hüppi, C. Borradori-Tolsa); Lausanne: University Hospital (CHUV), Department of Neonatology (J.-F. Tolsa, M. Roth-Kleiner), Department of Child Development (M. Bickle-Graz); Lucerne: Children's Hospital of Lucerne, Neonatal and Paediatric Intensive Care Unit (T. M. Berger), Department of Neuropaediatrics (T. Schmitt-Mechelke, F. Bauder); Lugano: Regional Hospital Lugano, Department of Paediatrics (V. Pezzoli); Muensterlingen: Cantonal Hospital Muensterlingen, Department of Paediatrics (B. Erkert, A. Mueller); Neuchatel: Cantonal Hospital Neuchatel, Department of Paediatrics (M. Ecoffey); St. Gallen: Cantonal Hospital St. Gallen, Department of Neonatology (A. Malzacher), Children's Hospital St. Gallen, Neonatal and Paediatric Intensive Care Unit (J. P. Micallef), Department of Child Development (A. Lang-Dullenkopf); Winterthur: Cantonal Hospital Winterthur, Department of Neonatology (L. Hegi), Social Paediatrics Center (M. von Rhein); Zurich: University Hospital Zurich (USZ), Department of Neonatology (D. Bassler, R. Arlettaz), University Children's Hospital Zurich, Department of Neonatology (V. Bernet) and Child Development Center (B. Latal, G. Natalucci); Zollikerberg: Hospital Zollikerberg, Neonatology Clinic (M. Moenkhoff).

## Author Contributions

Mr. Adams performed the biostatistical evaluation and together with Dr. Natalucci was involved in study design, data collection, analysis and interpretation of the results and wrote, reviewed and revised the manuscript.

Prof. Berger and Bassler, Drs. Borradori-Tolsa, Bickle-Graz, Grunt, and Gerull, were involved in data collection, study design, analysis and interpretation of data and reviewed the manuscript.

All authors approved the final manuscript as submitted and agree to be accountable for all aspects of the work.

## Data sharing statement



1  
2  
3 Additional data are available by emailing [mark.adams@usz.ch](mailto:mark.adams@usz.ch)  
4  
5  
6

7 **Patient and Public Involvement**

8 Patients or public were not involved in the development of the research question, the outcome  
9 measures or the study design. The results of this study will be disseminated to study participants, as  
10 well as to other patients, through the patient and public page of the Swiss neonatal and follow-up  
11 website.  
12  
13  
14  
15  
16  
17  
18  
19  
20  
21  
22  
23  
24  
25  
26  
27  
28  
29  
30  
31  
32  
33  
34  
35  
36  
37  
38  
39  
40  
41  
42  
43  
44  
45  
46  
47  
48  
49  
50  
51  
52  
53  
54  
55  
56  
57  
58  
59  
60

## References

- 1 Berger T, Bernet V, El Alama S, *et al.* Perinatal care at the limit of viability between 22 and 26 completed weeks of gestation in Switzerland. *Swiss Med Wkly* 2011;**141**. doi:10.4414/smw.2011.13280
- 2 Tyson JE, Stoll BJ. Evidence-based ethics and the care and outcome of extremely premature infants. *Clin Perinatol* 2003;**30**:363–87. doi:10.1016/S0095-5108(03)00028-9
- 3 Marlow N. The Elephant in the Delivery Room. *N Engl J Med* 2015;**372**:1856–7. doi:10.1056/NEJMe1502250
- 4 Rysavy MA, Li L, Bell EF, *et al.* Between-Hospital Variation in Treatment and Outcomes in Extremely Preterm Infants. *N Engl J Med* 2015;**372**:1801–11. doi:10.1056/NEJMoa1410689
- 5 Gallagher K, Martin J, Keller M, *et al.* European variation in decision-making and parental involvement during preterm birth. *Arch Dis Child - Fetal Neonatal Ed* 2014;**99**:F245–9. doi:10.1136/archdischild-2013-305191
- 6 Berger TM, Steurer MA, Bucher HU, *et al.* Retrospective cohort study of all deaths among infants born between 22 and 27 completed weeks of gestation in Switzerland over a 3-year period. *BMJ Open* 2017;**7**:e015179. doi:10.1136/bmjopen-2016-015179
- 7 Fischer N, Steurer MA, Adams M, *et al.* Survival rates of extremely preterm infants (gestational age <26 weeks) in Switzerland: impact of the Swiss guidelines for the care of infants born at the limit of viability. *Arch Dis Child - Fetal Neonatal Ed* 2009;**94**:F407–13. doi:10.1136/adc.2008.154567
- 8 Berger TM, Steurer MA, Woerner A, *et al.* Trends and centre-to-centre variability in survival rates of very preterm infants (<32 weeks) over a 10-year-period in Switzerland. *Arch Dis Child - Fetal Neonatal Ed* 2012;**97**:F323–8. doi:10.1136/fetalneonatal-2011-301008
- 9 Steurer MA, Adams M, Bacchetti P, *et al.* Swiss medical centres vary significantly when it comes to outcomes of neonates with a very low gestational age. *Acta Paediatr* 2015;**104**:872–9. doi:10.1111/apa.13047
- 10 Serenius F, Blennow M, Maršál K, *et al.* Intensity of Perinatal Care for Extremely Preterm Infants: Outcomes at 2.5 Years. *Pediatrics* 2015;**135**:e1163–72. doi:10.1542/peds.2014-2988
- 11 Marlow N, Bennett C, Draper ES, *et al.* Perinatal outcomes for extremely preterm babies in relation to place of birth in England: the EPICure 2 study. *Arch Dis Child - Fetal Neonatal Ed* 2014;**99**:F181–8. doi:10.1136/archdischild-2013-305555
- 12 Alleman BW, Bell EF, Li L, *et al.* Individual and Center-Level Factors Affecting Mortality Among Extremely Low Birth Weight Infants. *Pediatrics* 2013;**132**:e175–84. doi:10.1542/peds.2012-3707
- 13 Kollée L, Cuttini M, Delmas D, *et al.* Obstetric interventions for babies born before 28 weeks of gestation in Europe: results of the MOSAIC study. *BJOG Int J Obstet Gynaecol* 2009;**116**:1481–91. doi:10.1111/j.1471-0528.2009.02235.x

- 14 Schlapbach LJ, Adams M, Proietti E, *et al.* Outcome at two years of age in a Swiss national cohort of extremely preterm infants born between 2000 and 2008. *BMC Pediatr* 2012;**12**:198. doi:10.1186/1471-2431-12-198
- 15 Adams M, Borradori-Tolsa C, Bickle-Graz M, *et al.* Follow-up assessment of high-risk newborns in Switzerland. *Paedriatrica* 2014;**25**:6–10.
- 16 Bayley N. *Bayley Scales of Infant Development. 2nd edition.* San Antonio (TX): : The Psychological Corporation 1993.
- 17 Bayley N. *Bayley scales of infant and toddler development. 3rd ed.* San Antonio (TX): : Psychological Corporation 2006.
- 18 Griffiths R. *The Griffiths mental development scales. Association for Research in Infant and Child development.* Henley-on-Thames, UK: : The Test Agency 1996.
- 19 Vohr BR, Stephens BE, Higgins RD, *et al.* Are Outcomes of Extremely Preterm Infants Improving? Impact of Bayley Assessment on Outcomes. *J Pediatr* 2012;**161**:222-8.e3. doi:10.1016/j.jpeds.2012.01.057
- 20 Sharp M, DeMauro SB. Counterbalanced Comparison of the BSID-II and Bayley-III at Eighteen to Twenty-two Months Corrected Age. *J Dev Behav Pediatr* 2017;**38**:322. doi:10.1097/DBP.0000000000000441
- 21 Johnson S, Moore T, Marlow N. Using the Bayley-III to assess neurodevelopmental delay: which cut-off should be used? *Pediatr Res* 2014;**75**:670–4. doi:10.1038/pr.2014.10
- 22 Spencer-Smith MM, Spittle AJ, Lee KJ, *et al.* Bayley-III Cognitive and Language Scales in Preterm Children. *Pediatrics* 2015;:peds.2014-3039. doi:10.1542/peds.2014-3039
- 23 Cirelli I, Bickle Graz M, Tolsa J-F. Comparison of Griffiths-II and Bayley-II tests for the developmental assessment of high-risk infants. *Infant Behav Dev* 2015;**41**:17–25. doi:10.1016/j.infbeh.2015.06.004
- 24 Rosenbaum P, Paneth N, Leviton A, *et al.* A report: the definition and classification of cerebral palsy April 2006. *Dev Med Child Neurol Suppl* 2007;**109**:8–14.
- 25 Palisano R, Rosenbaum P, Walter S, *et al.* Development and reliability of a system to classify gross motor function in children with cerebral palsy. *Dev Med Child Neurol* 1997;**39**:214–23. doi:10.1111/j.1469-8749.1997.tb07414.x
- 26 Buuren S van, Groothuis-Oudshoorn K. mice: Multivariate Imputation by Chained Equations in R. *J Stat Softw* 2011;**45**.<http://www.jstatsoft.org/v45/i03> (accessed 18 Dec 2015).
- 27 Silva LK. Validity of the risk adjustment approach to compare outcomes. *Cad Saúde Pública* 2003;**19**:287–95. doi:10.1590/S0102-311X2003000100032
- 28 R: a language and environment for statistical computing. GBIF.ORG. <http://www.gbif.org/resource/81287> (accessed 18 Dec 2015).
- 29 Adams M, Braun J, Bucher HU, *et al.* Comparison of three different methods for risk adjustment in neonatal medicine. *BMC Pediatr* 2017;**17**:106. doi:10.1186/s12887-017-0861-5

- 1  
2  
3 30 Leversen KT, Sommerfelt K, Elgen IB, *et al.* Prediction of outcome at 5 years from  
4 assessments at 2 years among extremely preterm children: A Norwegian national cohort  
5 study. *Acta Paediatr* 2012;**101**:264–70. doi:10.1111/j.1651-2227.2011.02504.x  
6  
7 31 Marlow N. Is survival and neurodevelopmental impairment at 2 years of age the gold  
8 standard outcome for neonatal studies? *Arch Dis Child Fetal Neonatal Ed* 2015;**100**:F82–4.  
9 doi:10.1136/archdischild-2014-306191  
10  
11 32 Håkansson S, Farooqi A, Holmgren PÅ, *et al.* Proactive Management Promotes Outcome in  
12 Extremely Preterm Infants: A Population-Based Comparison of Two Perinatal Management  
13 Strategies. *Pediatrics* 2004;**114**:58–64. doi:10.1542/peds.114.1.58  
14  
15 33 Smith PB, Ambalavanan N, Li L, *et al.* Approach to Infants Born at 22 to 24 Weeks'  
16 Gestation: Relationship to Outcomes of More-Mature Infants. *Pediatrics* 2012;**129**:e1508–  
17 16. doi:10.1542/peds.2011-2216  
18  
19 34 Costeloe KL, Hennessy EM, Haider S, *et al.* Short term outcomes after extreme preterm  
20 birth in England: comparison of two birth cohorts in 1995 and 2006 (the EPICure studies).  
21 *BMJ* 2012;**345**:e7976. doi:10.1136/bmj.e7976  
22  
23  
24  
25  
26  
27  
28  
29  
30  
31  
32  
33  
34  
35  
36  
37  
38  
39  
40  
41  
42  
43  
44  
45  
46  
47  
48  
49  
50  
51  
52  
53  
54  
55  
56  
57  
58  
59  
60

## Figures

Figure 1. Study population overview

Figure 2. Odds ratios of outcome when born in a unit with high perinatal interventional activity

Legend: Odds ratios with 95% confidence interval of outcome when born in high activity units, crude or adjusted for GA, GA<sup>2</sup>, birth weight z-score, male sex, multiple births, and socio-economic status. Dotted lines represent results received when using non-imputed data. AUC: area under receiver operator characteristic (ROC) curve representing predictive validity of risk adjustment.

Figure 3. Age at death in NICU (days)

Legend: Log-transformed age at death in NICU (days) for low and high activity centres in cohort A and cohort B. Crude y-axis scale on right hand side. Violin plot: box-plot with median, interquartile range and density (width = frequency). GA: gestational age. NICU: neonatal intensive care unit.

## Tables

**Table 1. Baseline characteristics cohorts A / B: children with and without 2-year follow-up**

|                              | <b>Cohort A (22 – 25 weeks GA)</b> |                     | <b>Cohort B (26 – 27 weeks GA)</b> |                   |
|------------------------------|------------------------------------|---------------------|------------------------------------|-------------------|
|                              | with FU                            | lost to FU          | with FU                            | lost to FU        |
| <b>N</b>                     | 319 (88.6%)                        | 41 (11.4%)          | 743 (82.9%)                        | 153 (17.1%)       |
| <b>Gestational age (iqr)</b> | 25.3 (24.7 to 25.6)                | 25 (24.6 to 25.6)   | 27 (26.4 to 27.4)                  | 27 (26.6 to 27.4) |
| <b>BW z-score (iqr)</b>      | -0.1 (-0.6 to 0.4)                 | -0.3 (-0.6 to 0.3)  | 0 (-0.7 to 0.5)                    | 0.2 (-0.5 to 0.5) |
| <b>Male sex</b>              | 53.9 %                             | 48.8 %              | 52.9 %                             | 56.2 %            |
| <b>Multiple births</b>       | 22.3 %                             | 26.8 %              | 26.8 %                             | 24.8 %            |
| <b>Outborn</b>               | 2.2 %                              | 9.8 %               | 4.2 %                              | 7.2 %             |
| <b>SES (iqr)</b>             | 6 (5 to 8)                         | 7 (4.2 to 10)       | 6 (4 to 8)                         | 6 (4 to 8)        |
| <b>Activity Score (iqr)</b>  | 87.5 (73.7 to 89.2)                | 84.1 (77.8 to 89.2) | 85.8 (84.2 to 91)                  | 88.7 (84.2 to 91) |
| <b>Major morbidity</b>       | 60.8 %                             | 53.7 %              | 39.9 %                             | 35 %              |

Legend: FU: follow-up; Iqr: interquartile range; SES: socio-economic status was calculated by means of a score reflecting both maternal education and paternal occupation, with a maximum and minimum scores of 12 and 2, indicating lower and higher status, respectively.

**Table 2. Center activity grouping cohort A (standardized ratios)**

|                                             | C 1 | C 2 | C 3 | C 4 | C 5  | C 6  | C 7  | C 8  | C 9  | Highest Proportion* |
|---------------------------------------------|-----|-----|-----|-----|------|------|------|------|------|---------------------|
| <b>Inborn [1]</b>                           | 95  | 98  | 94  | 96  | 96   | 99   | 100  | 96   | 97   | 100%                |
| <b>Full course antenatal steroids [2]</b>   | 56  | 64  | 80  | 88  | 91   | 81   | 100  | 88   | 97   | 51.5%               |
| <b>Caesarean section [3]</b>                | 44  | 81  | 67  | 50  | 88   | 100  | 93   | 97   | 93   | 60.7%               |
| <b>Obstetric activity</b>                   | 66  | 83  | 82  | 80  | 94   | 96   | 100  | 96   | 98   | -                   |
| <b>Delivery room intubation or CPAP [4]</b> | 37  | 40  | 61  | 83  | 76   | 83   | 83   | 93   | 100  | 71.9%               |
| <b>Surfactant &lt; 2 hours [5]</b>          | 44  | 39  | 51  | 35  | 73   | 82   | 84   | 97   | 100  | 65.6%               |
| <b>Intensive care started [6]</b>           | 57  | 78  | 78  | 100 | 79   | 83   | 81   | 88   | 99   | 81.7%               |
| <b>Admitted [7]</b>                         | 57  | 64  | 77  | 92  | 79   | 79   | 76   | 88   | 100  | 81.2%               |
| <b>Neonatal activity</b>                    | 49  | 55  | 67  | 78  | 77   | 82   | 81   | 92   | 100  | -                   |
| <b>Activity score</b>                       | 57  | 68  | 74  | 78  | 84   | 88   | 89   | 93   | 98   | -                   |
| <b>Activity group</b>                       | low | low | low | Low | high | high | high | high | high | -                   |

Legend: [1]-[3]: Key obstetric indicators; [4]-[7]: key neonatal indicators; C1 – C9: centres 1 – 9; CPAP: continuous pulmonary airway pressure.\*Highest proportion: actual proportion of infants receiving intervention in center with highest incidence, standardized as 100 in activity score.

**Table 3 Low vs. high activity centres cohorts A and B**

|                                           | <b>Cohort A (22 – 25 weeks GA)</b> |                        | <b>Cohort B (26 – 27 weeks GA)</b> |                      |
|-------------------------------------------|------------------------------------|------------------------|------------------------------------|----------------------|
|                                           | low activity                       | high activity          | low activity                       | high activity        |
| <b>N</b>                                  | 461 (49.7%)                        | 466 (50.3%)            | 554 (52.9%)                        | 493 (47.1%)          |
| <b>Gestational age (iqr)</b>              | 24.7<br>(24 to 25.3)               | 24.6<br>(23.6 to 25.3) | 26.9<br>(26.4 to 27.4)             | 27<br>(26.4 to 27.4) |
| <b>BW z-score (iqr)</b>                   | -0.3<br>(-0.8 to 0.3)              | -0.4<br>(-1 to 0.2)    | 0<br>(-0.7 to 0.5)                 | 0<br>(-0.8 to 0.5)   |
| <b>Male sex</b>                           | 51.6 %                             | 57.6 %                 | 52.1 %                             | 55.8 %               |
| <b>Multiple births</b>                    | 28.2 %                             | 27.5 %                 | 24.2 %                             | 28.2 %               |
| <b>Outborn</b>                            | 3.9 %                              | 2.1 %                  | 5.2 %                              | 3.4 %                |
| <b>SES (iqr)</b>                          | 6 (4 to 8)                         | 6 (5 to 8)             | 6 (4 to 8)                         | 6 (4 to 8)           |
| <b>Activity Score (iqr)</b>               | 68.1<br>(68.1 to 73.7)             | 89.2<br>(87.5 to 92.7) | 84.2<br>(83.3 to 85.8)             | 91<br>(90.2 to 92.3) |
| <b>Mortality</b>                          | 71.4 %                             | 51.1 %                 | 18.2 %                             | 10.1 %               |
| - Died in delivery room                   | 41.9 %                             | 34.1 %                 | 1.6 %                              | 1.8 %                |
| - NICU mortality                          | 29.5 %                             | 17 %                   | 16.6 %                             | 8.3 %                |
| <b>Death or NDI</b>                       | 78.2 %                             | 62.9 %                 | 30.3 %                             | 24.6 %               |
| <b>Any major morbidity (survivors)</b>    | 62.1 %                             | 58.7 %                 | 43.8 %                             | 34.2 %               |
| <b>Moderate to Severe NDI (survivors)</b> | 18.3 %                             | 18.6 %                 | 11.9 %                             | 14.3 %               |
| <b>Age at death in NICU (days) (iqr)</b>  | 4<br>(1.5 to 10.2)                 | 8<br>(1.5 to 18)       | 6<br>(3 to 14)                     | 13<br>(4 to 24)      |
| <b>Length of stay (days) (iqr)</b>        | 73.5 (4 to 101.8)                  | 100 (63 to 120)        | 79<br>(64 to 95)                   | 85<br>(72 to 97)     |

Legend: GA: gestational age; Iqr: interquartile range; SES: socio-economic score was calculated by means of a score reflecting both maternal education and paternal occupation, with a maximum and minimum scores of 12 and 2, indicating lower and higher status, respectively; NDI: neurodevelopmental impairment; NICU: neonatal intensive care unit.



**Table 4. Outcome at 2 years of age (corrected)**

|                                          | <b>Cohort A</b> | <b>Cohort B</b> | <b>All infants</b> |
|------------------------------------------|-----------------|-----------------|--------------------|
| <b>Survivors at 2-year Follow-up (N)</b> | 319             | 743             | 1062               |
| <b>Mean age at 2-year Follow-up (sd)</b> | 22.5 (3)        | 22.6 (3.1)      | 22.6 (3.1)         |
| <b>Outcome at 2-year Follow-up</b>       |                 |                 |                    |
| Favourable ND                            | 81.5 %          | 86.9 %          | 85.3 %             |
| Moderate-to-severe NDI                   | 18.5 %          | 13.1 %          | 14.7 %             |
| <b>No developmental test performed</b>   | 2.8 %           | 1.4 %           | 1.8 %              |
| <b>BSID-II</b>                           | 63 %            | 71.4 %          | 68.8 %             |
| Mean MDI (sd)                            | 87.3 (18.8)     | 89.9 (17.2)     | 89.2 (17.7)        |
| Mean-PDI (sd)                            | 85.1 (18.7)     | 88.1 (17.2)     | 87.3 (17.7)        |
| <b>GMDS</b>                              | 6.0 %           | 3.6 %           | 4.3 %              |
| Mean GMDS w/o motor (sd)                 | 84.2 (18.2)     | 83.7 (20.7)     | 83.9 (19.5)        |
| <b>Bayley-III</b>                        | 28.2 %          | 23.6 %          | 25.0 %             |
| Mean cognitive composite score (sd)      | 98.2 (16.3)     | 101.4 (13.8)    | 100.3 (14.7)       |
| Mean composite motor score (sd)          | 94.7 (15.2)     | 97 (13.4)       | 96.2 (14.0)        |
| <b>Cerebral palsy</b>                    | 7.5 %           | 6.1 %           | 6.5 %              |
| GMFCS 1                                  | 5.0 %           | 4.2 %           | 4.4 %              |
| GMFCS 2                                  | 1.3 %           | 0.8 %           | 0.9 %              |
| GMFCS 3-5                                | 0.6 %           | 1.1 %           | 0.9 %              |
| <b>Severe visual problems</b>            | 0.0 %           | 0.3 %           | 0.2 %              |
| <b>Severe hearing problems</b>           | 1.7 %           | 0.7 %           | 1 %                |

Legend: Cohort A: 22 0/7 to 25 6/7 weeks gestation; cohort B: 26 0/7 to 27 6/7 weeks gestation; BSID-II: Bayley Scales of Infant Development, 2nd ed.; BSID-III / B-III: Bayley Scales of Infant and Toddler Development, 3rd ed.; Favourable ND: favourable neurodevelopment, i.e. absence of any NDI. FU: follow-up; GMDS: Griffiths Mental Developmental Scales; GMFCS: Gross Motor Function Classification System; MDI: Mental developmental index; N: number of; PDI: Psychomotor developmental index; sd: standard deviation.

1  
2  
3  
4  
5  
6  
7  
8  
9  
10  
11  
12  
13  
14  
15  
16  
17  
18  
19  
20  
21  
22  
23  
24  
25  
26  
27  
28  
29  
30  
31  
32  
33  
34  
35  
36  
37  
38  
39  
40  
41  
42  
43  
44  
45  
46  
47  
48  
49  
50  
51  
52  
53  
54  
55  
56  
57  
58  
59  
60

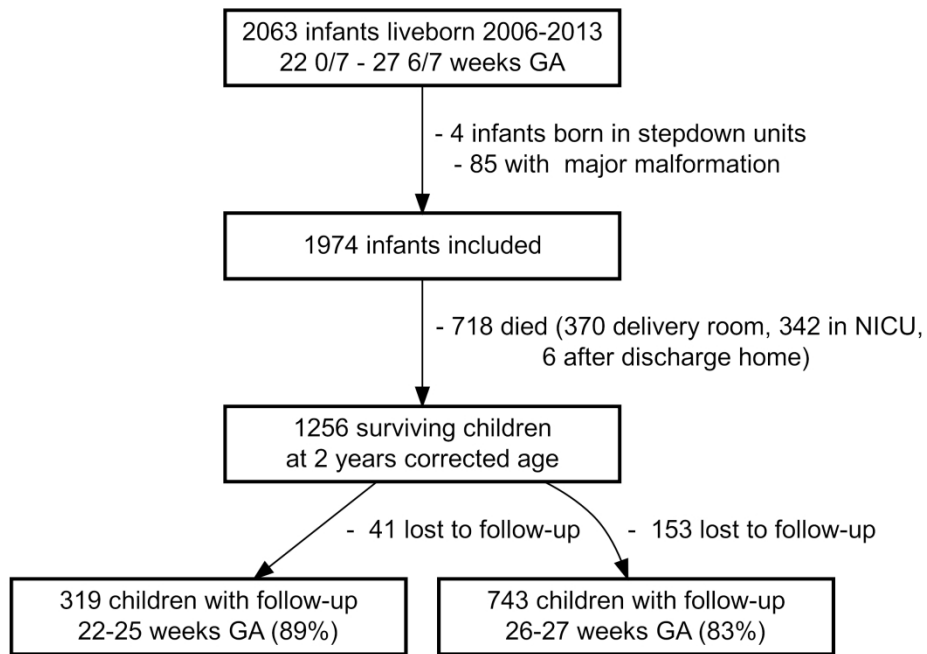

Figure 1 Study population overview

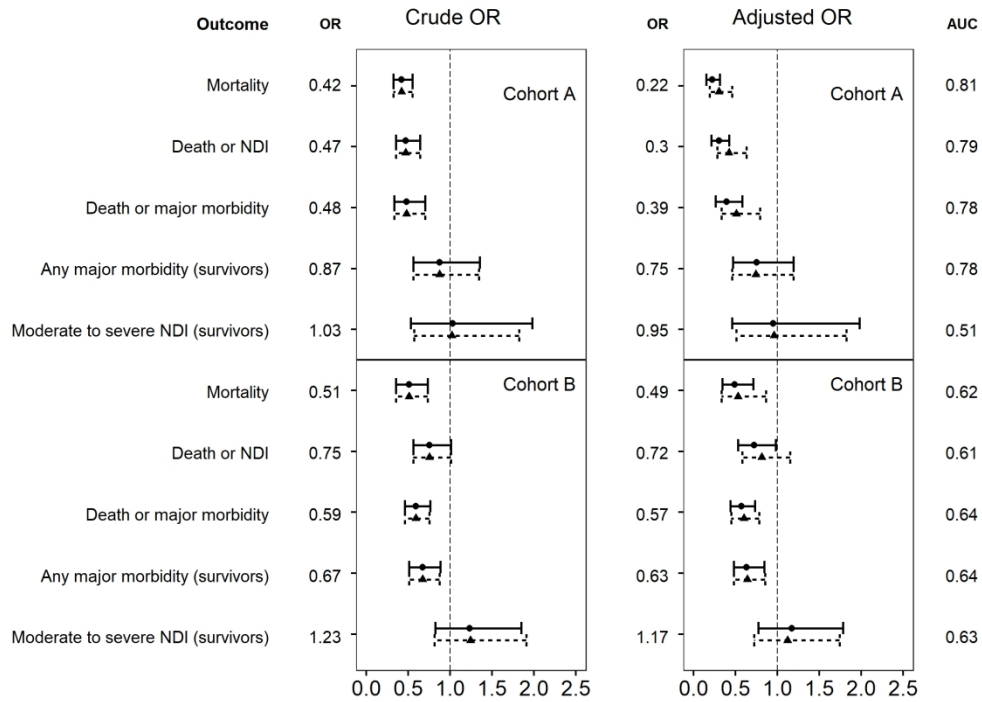

Figure 2. Odds ratios of outcome when born in a unit with high perinatal interventional activity Legend: Odds ratios with 95% confidence interval of outcome when born in high activity units, crude or adjusted for GA, GA2, birth weight z-score, male sex, multiple births, and socio-economic status. Dotted lines represent results received when using non-imputed data. AUC: area under receiver operator characteristic (ROC) curve representing predictive validity of risk adjustment.

199x149mm (300 x 300 DPI)

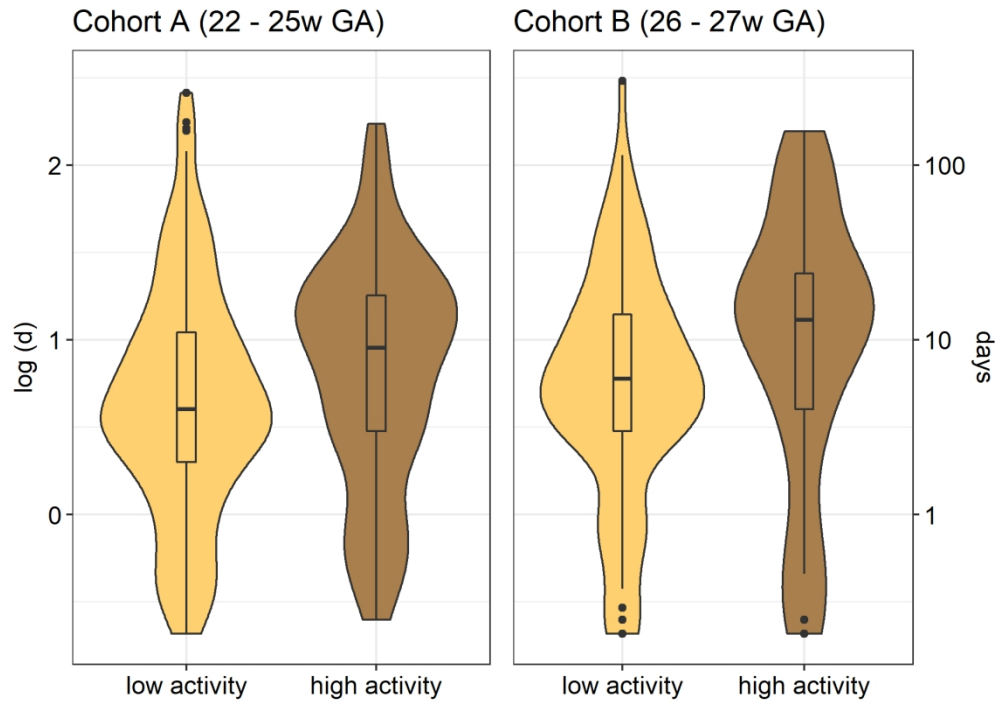

Figure 3. Age at death in NICU (days)

Legend: Log-transformed age at death in NICU (days) for low and high activity centres in cohort A and cohort B. Crude y-axis scale on right hand side. Violin plot: box-plot with median, interquartile range and density (width = frequency). GA: gestational age. NICU: neonatal intensive care unit.

169x119mm (300 x 300 DPI)

**Supplemental table 1. Center activity grouping cohort B (standardized ratios)**

|                                             | C4  | C1  | C2  | C3  | C6   | C5   | C7   | C9   | C8   | Highest Proportion* |
|---------------------------------------------|-----|-----|-----|-----|------|------|------|------|------|---------------------|
| <b>Inborn [1]</b>                           | 94  | 99  | 98  | 97  | 95   | 100  | 100  | 98   | 100  | 97.8%               |
| <b>Full course antenatal steroids [2]</b>   | 74  | 86  | 90  | 94  | 88   | 90   | 86   | 100  | 84   | 80.4%               |
| <b>Sectio [3]</b>                           | 76  | 88  | 84  | 80  | 91   | 100  | 82   | 89   | 77   | 95.6%               |
| <b>Obstetric activity</b>                   | 84  | 94  | 94  | 93  | 94   | 100  | 92   | 99   | 90   | -                   |
| <b>Delivery room intubation or CPAP [4]</b> | 68  | 50  | 60  | 71  | 75   | 76   | 87   | 81   | 100  | 83.5%               |
| <b>Surfactant &lt; 2 h [5]</b>              | 19  | 54  | 54  | 58  | 72   | 63   | 89   | 76   | 100  | 77.2%               |
| <b>IC started [6]</b>                       | 100 | 98  | 99  | 98  | 99   | 98   | 98   | 100  | 100  | 100%                |
| <b>Admitted [7]</b>                         | 98  | 100 | 98  | 99  | 98   | 98   | 97   | 100  | 100  | 100%                |
| <b>Neonatal Activity</b>                    | 72  | 76  | 78  | 81  | 86   | 84   | 93   | 89   | 100  | -                   |
| <b>Activity Score</b>                       | 76  | 83  | 84  | 86  | 89   | 90   | 91   | 92   | 93   | -                   |
| <b>Activity group</b>                       | low | low | low | low | high | high | high | high | high | -                   |

Legend: [1]-[3]: Key obstetric indicators; [4]-[7]: key neonatal indicators; C1 – C9: centers 1 – 9; CPAP: continuous pulmonary airway pressure. \*Highest proportion: actual proportion of infants receiving intervention in center with highest incidence, standardized as 100 in activity score.

Supplemental Figure 1. Odds ratios of outcome when born in a unit with high perinatal interventional activity after exclusion of all outborn infants

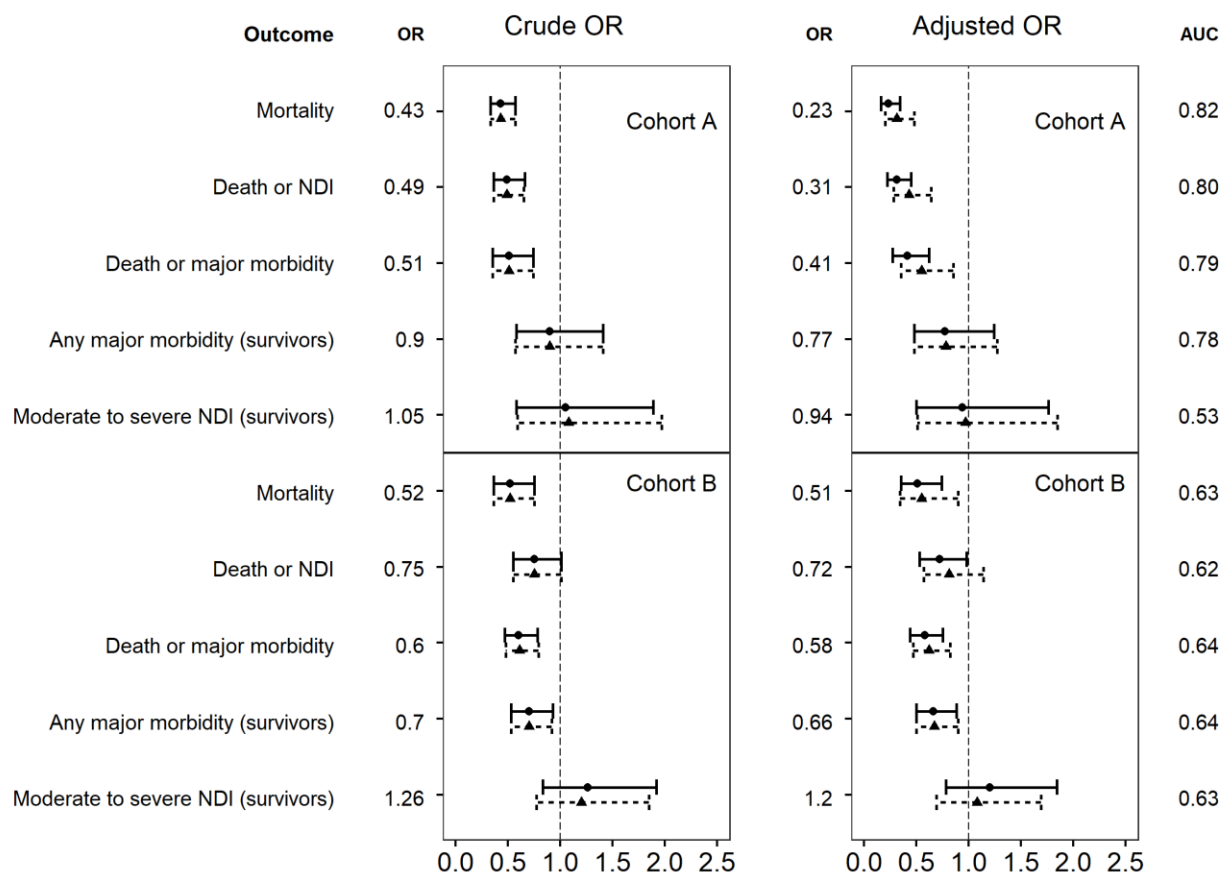

Legend: Odds ratios with 95% confidence interval of outcome when born in high activity units, crude or adjusted for GA, GA<sup>2</sup>, birth weight z-score, male sex, multiple births, socio-economic status. Dotted lines represent results received when using non-imputed data. AUC: area under receiver operator characteristic (ROC) curve representing predictive validity of risk adjustment.

STROBE Statement—Checklist of items that should be included in reports of *cohort studies*

|                              | Item No | Recommendation                                                                                                                                                                                                                                                                                                                                                                                                                                                                                                                    |
|------------------------------|---------|-----------------------------------------------------------------------------------------------------------------------------------------------------------------------------------------------------------------------------------------------------------------------------------------------------------------------------------------------------------------------------------------------------------------------------------------------------------------------------------------------------------------------------------|
| <b>Title and abstract</b>    | 1       | (a) Indicate the study's design with a commonly used term in the title or the abstract<br>- mentioned in the abstract (design), p. 2<br>(b) Provide in the abstract an informative and balanced summary of what was done and what was found<br>- done, p. 2                                                                                                                                                                                                                                                                       |
| <b>Introduction</b>          |         |                                                                                                                                                                                                                                                                                                                                                                                                                                                                                                                                   |
| Background/rationale         | 2       | Explain the scientific background and rationale for the investigation being reported<br>- done (see introduction), p. 4                                                                                                                                                                                                                                                                                                                                                                                                           |
| Objectives                   | 3       | State specific objectives, including any prespecified hypotheses<br>- done (see introduction), p. 5                                                                                                                                                                                                                                                                                                                                                                                                                               |
| <b>Methods</b>               |         |                                                                                                                                                                                                                                                                                                                                                                                                                                                                                                                                   |
| Study design                 | 4       | Present key elements of study design early in the paper<br>- done (see article summary, introduction, methods ), pp. 2, 4ff.                                                                                                                                                                                                                                                                                                                                                                                                      |
| Setting                      | 5       | Describe the setting, locations, and relevant dates, including periods of recruitment, exposure, follow-up, and data collection<br>- done (see methods), pp. 5-8                                                                                                                                                                                                                                                                                                                                                                  |
| Participants                 | 6       | (a) Give the eligibility criteria, and the sources and methods of selection of participants. Describe methods of follow-up<br>- done (see methods – study population), p. 5<br>(b) For matched studies, give matching criteria and number of exposed and unexposed<br>- NA                                                                                                                                                                                                                                                        |
| Variables                    | 7       | Clearly define all outcomes, exposures, predictors, potential confounders, and effect modifiers. Give diagnostic criteria, if applicable<br>- done (see methods), pp. 5-8                                                                                                                                                                                                                                                                                                                                                         |
| Data sources/<br>measurement | 8*      | For each variable of interest, give sources of data and details of methods of assessment (measurement). Describe comparability of assessment methods if there is more than one group<br>- done (see methods), pp. 5-8                                                                                                                                                                                                                                                                                                             |
| Bias                         | 9       | Describe any efforts to address potential sources of bias<br>- done (see methods – outcome / data completeness / statistical methods), pp. 7-8                                                                                                                                                                                                                                                                                                                                                                                    |
| Study size                   | 10      | Explain how the study size was arrived at<br>- done (see methods – study population), p. 5                                                                                                                                                                                                                                                                                                                                                                                                                                        |
| Quantitative variables       | 11      | Explain how quantitative variables were handled in the analyses. If applicable, describe which groupings were chosen and why<br>- done (see methods – outcome definitions / data completeness / statistical methods), pp. 7-8                                                                                                                                                                                                                                                                                                     |
| Statistical methods          | 12      | (a) Describe all statistical methods, including those used to control for confounding<br>- done (see methods – statistical methods) p. 8<br>(b) Describe any methods used to examine subgroups and interactions<br>- done (see methods – statistical methods), p. 8<br>(c) Explain how missing data were addressed<br>- done (see methods – data completeness), p. 8<br>(d) If applicable, explain how loss to follow-up was addressed<br>- done (see methods – data completeness), p. 8<br>(e) Describe any sensitivity analyses |

|                          |     |                                                                                                                                                                                                                                                              |
|--------------------------|-----|--------------------------------------------------------------------------------------------------------------------------------------------------------------------------------------------------------------------------------------------------------------|
|                          |     | - done (see methods – statistical methods), p. 8                                                                                                                                                                                                             |
| <b>Results</b>           |     |                                                                                                                                                                                                                                                              |
| Participants             | 13* | (a) Report numbers of individuals at each stage of study—eg numbers potentially eligible, examined for eligibility, confirmed eligible, included in the study, completing follow-up, and analysed<br>- done (see results), pp. 9-11                          |
|                          |     | (b) Give reasons for non-participation at each stage<br>- done (results – study population), p. 9                                                                                                                                                            |
|                          |     | (c) Consider use of a flow diagram<br>- done (Figure 1)                                                                                                                                                                                                      |
| Descriptive data         | 14* | (a) Give characteristics of study participants (eg demographic, clinical, social) and information on exposures and potential confounders<br>- done (see results, flow-chart, discussion, tables), pp. 9ff.                                                   |
|                          |     | (b) Indicate number of participants with missing data for each variable of interest<br>- done (see methods – data completeness), p. 8                                                                                                                        |
|                          |     | (c) Summarise follow-up time (eg, average and total amount)<br>- done (Table 4), p. 26                                                                                                                                                                       |
| Outcome data             | 15* | Report numbers of outcome events or summary measures over time<br>- done (see results), p. 9 – 11                                                                                                                                                            |
| Main results             | 16  | (a) Give unadjusted estimates and, if applicable, confounder-adjusted estimates and their precision (eg, 95% confidence interval). Make clear which confounders were adjusted for and why they were included<br>- done (see methods and results), pp. 5 – 11 |
|                          |     | (b) Report category boundaries when continuous variables were categorized<br>- done (see methods – perinatal interventional activity score), p. 6 f.                                                                                                         |
|                          |     | (c) If relevant, consider translating estimates of relative risk into absolute risk for a meaningful time period<br>- NA: cohort study setting required calculation of odds ratios.                                                                          |
| Other analyses           | 17  | Report other analyses done—eg analyses of subgroups and interactions, and sensitivity analyses<br>- done (see results and discussion) pp. 10-11                                                                                                              |
| <b>Discussion</b>        |     |                                                                                                                                                                                                                                                              |
| Key results              | 18  | Summarise key results with reference to study objectives<br>- done (see discussion paragraph 1), p. 11f                                                                                                                                                      |
| Limitations              | 19  | Discuss limitations of the study, taking into account sources of potential bias or imprecision. Discuss both direction and magnitude of any potential bias<br>- done (see article summary), p. 2 f.                                                          |
| Interpretation           | 20  | Give a cautious overall interpretation of results considering objectives, limitations, multiplicity of analyses, results from similar studies, and other relevant evidence<br>- done (see discussion / conclusion), p. 14                                    |
| Generalisability         | 21  | Discuss the generalisability (external validity) of the study results<br>- done (see discussion), pp. 11-14                                                                                                                                                  |
| <b>Other information</b> |     |                                                                                                                                                                                                                                                              |
| Funding                  | 22  | Give the source of funding and the role of the funders for the present study and, if applicable, for the original study on which the present article is based<br>- done (see declarations – competing interests), p. 1                                       |

\*Give information separately for exposed and unexposed groups.



1  
2 **Note:** An Explanation and Elaboration article discusses each checklist item and gives methodological background and  
3 published examples of transparent reporting. The STROBE checklist is best used in conjunction with this article (freely  
4 available on the Web sites of PLoS Medicine at <http://www.plosmedicine.org/>, Annals of Internal Medicine at  
5 <http://www.annals.org/>, and Epidemiology at <http://www.epidem.com/>). Information on the STROBE Initiative is  
6 available at <http://www.strobe-statement.org>.  
7  
8  
9  
10  
11  
12  
13  
14  
15  
16  
17  
18  
19  
20  
21  
22  
23  
24  
25  
26  
27  
28  
29  
30  
31  
32  
33  
34  
35  
36  
37  
38  
39  
40  
41  
42  
43  
44  
45  
46  
47  
48  
49  
50  
51  
52  
53  
54  
55  
56  
57  
58  
59  
60
