# Supplementary material for: Association between perinatal interventional activity and 2-year outcome of Swiss extremely preterm born infants: a population-based cohort study
Source: PubMed Central journal article supplement — BMJ Open. 2019 Mar 15;9(3):e024560. doi: 10.1136/bmjopen-2018-024560 (PMC6429852; doi:10.1136/bmjopen-2018-024560), 2019-03-15
Supplement: bmjopen-2018-024560supp001.pdf [file bmjopen-2018-024560supp001.pdf]

**Supplemental table 1. Center activity grouping cohort B (standardized ratios)**

|                                             | C4  | C1  | C2  | C3  | C6   | C5   | C7   | C9   | C8   | Highest Proportion* |
|---------------------------------------------|-----|-----|-----|-----|------|------|------|------|------|---------------------|
| <b>Inborn [1]</b>                           | 94  | 99  | 98  | 97  | 95   | 100  | 100  | 98   | 100  | 97.8%               |
| <b>Full course antenatal steroids [2]</b>   | 74  | 86  | 90  | 94  | 88   | 90   | 86   | 100  | 84   | 80.4%               |
| <b>Sectio [3]</b>                           | 76  | 88  | 84  | 80  | 91   | 100  | 82   | 89   | 77   | 95.6%               |
| <b>Obstetric activity</b>                   | 84  | 94  | 94  | 93  | 94   | 100  | 92   | 99   | 90   | -                   |
| <b>Delivery room intubation or CPAP [4]</b> | 68  | 50  | 60  | 71  | 75   | 76   | 87   | 81   | 100  | 83.5%               |
| <b>Surfactant &lt; 2 h [5]</b>              | 19  | 54  | 54  | 58  | 72   | 63   | 89   | 76   | 100  | 77.2%               |
| <b>IC started [6]</b>                       | 100 | 98  | 99  | 98  | 99   | 98   | 98   | 100  | 100  | 100%                |
| <b>Admitted [7]</b>                         | 98  | 100 | 98  | 99  | 98   | 98   | 97   | 100  | 100  | 100%                |
| <b>Neonatal Activity</b>                    | 72  | 76  | 78  | 81  | 86   | 84   | 93   | 89   | 100  | -                   |
| <b>Activity Score</b>                       | 76  | 83  | 84  | 86  | 89   | 90   | 91   | 92   | 93   | -                   |
| <b>Activity group</b>                       | low | low | low | low | high | high | high | high | high | -                   |

Legend: [1]-[3]: Key obstetric indicators; [4]-[7]: key neonatal indicators; C1 – C9: centers 1 – 9; CPAP: continuous pulmonary airway pressure. \*Highest proportion: actual proportion of infants receiving intervention in center with highest incidence, standardized as 100 in activity score.

Supplemental Figure 1. Odds ratios of outcome when born in a unit with high perinatal interventional activity after exclusion of all outborn infants

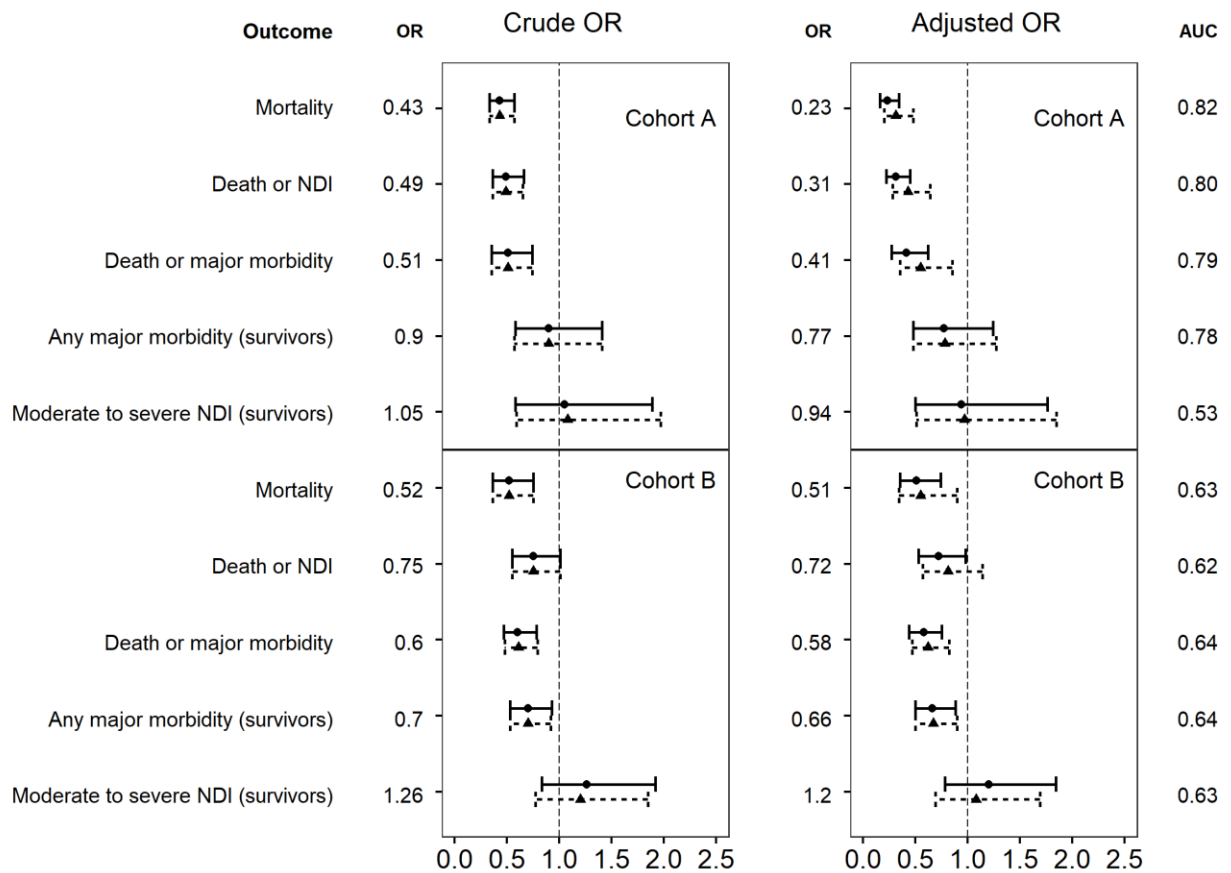

Legend: Odds ratios with 95% confidence interval of outcome when born in high activity units, crude or adjusted for GA, GA<sup>2</sup>, birth weight z-score, male sex, multiple births, socio-economic status. Dotted lines represent results received when using non-imputed data. AUC: area under receiver operator characteristic (ROC) curve representing predictive validity of risk adjustment.
